# Supplementary material for: Proteomic Signature of the Murine Intervertebral Disc
Source: PubMed Central journal article supplement (PMC4331544; doi:10.1371/journal.pone.0117807), 2015-02-17
Supplement: pone.0117807.s001.pdf [file pone.0117807.s001.pdf]

**Supplementary Table 1:** Proteins identified that were considered preliminary according to Uniprot.

| Uniprot Accession No. | Protein Name                                          | % Coverage | No. Different Peptides |
|-----------------------|-------------------------------------------------------|------------|------------------------|
| A2AAU3                | Probable helicase with zinc finger domain             | 88.89      | 2                      |
| E9QM04                | Fc receptor-like protein 6                            | 77.78      | 2                      |
| D3Z184                | Ropporin-1                                            | 68.85      | 3                      |
| E9Q7C4                | Proline rich 14-like                                  | 68.85      | 3                      |
| A2AJH3                | Glycylpeptide N-tetradecanoyltransferase 2            | 68.69      | 3                      |
| D3YTR0                | Adenomatous polyposis coli protein 2                  | 65.82      | 2                      |
| E9PZH6                | WW domain-containing adapter protein with coiled-coil | 65.82      | 2                      |
| E9PZ84                | Tetratricopeptide repeat protein 16                   | 60.86      | 2                      |
| D6Q0F7                | Cytoplasmic dynein intermediate chain 2 isoform 2.5   | 57.01      | 2                      |
| D3YTN4                | GTPase IMAP family member 4                           | 53.62      | 4                      |
| E9PZ97                | Bloom syndrome protein homolog                        | 53.62      | 3                      |
| B1AQ57                | Copper-transporting ATPase 2                          | 48.82      | 2                      |
| D3YTR2                | Receptor expression-enhancing protein 6               | 46.10      | 4                      |
| E9PZJ8                | Activating signal cointegrator 1 complex subunit 3    | 46.10      | 2                      |
| E0CXJ6                | Tubulin-specific chaperone E                          | 45.00      | 2                      |
| E9QMU1                | Kinesin-like protein KIF7                             | 45.00      | 2                      |
| D3YUE4                | Family with sequence similarity 151, member B         | 41.51      | 3                      |
| E2QRQ3                | Double-stranded RNA-binding protein Staufen homolog 2 | 40.25      | 2                      |
| E9QNR8                | 4930432K21Rik                                         | 40.25      | 2                      |
| B1B1B8                | Phosphatase and actin regulator 1                     | 39.07      | 2                      |
| D3YUX1                | Pogo transposable element with ZNF domain             | 38.26      | 4                      |
| E9Q1E1                | Trophinin                                             | 38.26      | 4                      |
| D3YTT4                | Isobutyryl-CoA dehydrogenase, mitochondrial           | 35.46      | 4                      |
| E9PZS7                | Olfactory receptor 287                                | 35.46      | 4                      |
| E9Q8P0                | Troponin C, slow skeletal and cardiac muscles         | 35.04      | 2                      |
| D3YYQ4                | Carbonic anhydrase 1                                  | 34.29      | 3                      |
| E9Q4S3                | Ninein                                                | 34.29      | 3                      |
| E9PYJ9                | LIM domain-binding protein 3                          | 34.09      | 2                      |
| D3YUE7                | GRAM domain-containing protein 4                      | 33.67      | 3                      |
| E9PZX1                | Gm17384                                               | 33.43      | 7                      |
| D3YTT9                | ZZ-type zinc finger-containing protein 3              | 32.88      | 6                      |
| E9PXF0                | Protocadherin 17                                      | 29.89      | 2                      |
| D3YTU3                | Mina                                                  | 29.68      | 5                      |
| E9PZW8                | Unconventional myosin-IXb                             | 29.68      | 5                      |
| D6RFP6                | Dual-specificity testis-specific protein kinase 1     | 27.83      | 2                      |
| E9QLK3                | BRCA1-associated ATM activator 1                      | 27.83      | 2                      |
| E9PV45                | Ubiquitin carboxyl-terminal hydrolase                 | 27.27      | 2                      |
| E9Q2N7                | Interferon-induced guanylate-binding protein 2        | 26.19      | 3                      |
| E9PW85                | Inactive serine/threonine-protein kinase VRK3         | 24.82      | 2                      |
| D3Z7R1                | Pyridoxal kinase                                      | 24.75      | 2                      |
| D3Z5P0                | Serine/threonine-protein kinase BRSK1                 | 24.42      | 2                      |
| E9QAF1                | Spata31d1c                                            | 24.42      | 2                      |
| E9PUV9                | Caspase recruitment domain-containing protein 10      | 24.32      | 2                      |
| D3YWN6                | Protein downstream neighbor of Son                    | 24.11      | 3                      |

|        |                                                           |       |   |
|--------|-----------------------------------------------------------|-------|---|
| D3YYS9 | Acid-sensing ion channel 4                                | 23.81 | 2 |
| E9Q4Z5 | Gm6729                                                    | 23.81 | 2 |
| D3YX57 | Fanconi anemia group I protein homolog                    | 23.47 | 3 |
| E9Q3G8 | Nucleoporin 153                                           | 23.47 | 3 |
| D3YWA6 | Serine/threonine-protein kinase 33                        | 22.69 | 2 |
| E9Q2Z1 | Cat eye syndrome chromosome region, candidate 2           | 22.69 | 2 |
| B1AUY3 | Rho GTPase activating protein 4                           | 22.45 | 2 |
| E9PYB0 | AHNAK nucleoprotein 2                                     | 22.02 | 2 |
| D3Z3A9 | Reticulocalbin-3                                          | 20.28 | 3 |
| E9Q8I5 | Zinc finger protein 108                                   | 20.28 | 3 |
| E0CY73 | 1700112E06Rik                                             | 20.21 | 2 |
| E9QN41 | Striatin-interacting proteins 2                           | 20.21 | 2 |
| D3YWY5 | Mth938 domain-containing protein                          | 18.71 | 4 |
| E9Q3D6 | Heat shock protein HSP 90-beta                            | 18.71 | 4 |
| D3YTR7 | Adenylyl cyclase-associated protein                       | 18.63 | 3 |
| E9PZM4 | Chromodomain helicase DNA binding protein 2               | 18.63 | 2 |
| D3Z5N5 | 1-phosphatidylinositol 3-phosphate 5-kinase               | 18.49 | 3 |
| E9QAE4 | Nsd1                                                      | 18.49 | 3 |
| E9QKK1 | Centromere-associated protein E                           | 17.74 | 2 |
| E9Q072 | Selection and upkeep of intraepithelial T-cells protein 5 | 17.67 | 9 |
| D3Z678 | Gm15448                                                   | 17.50 | 2 |
| E9Q7D5 | Rho guanine nucleotide exchange factor (GEF) 5            | 17.23 | 2 |
| D3YUF9 | UDP-glucuronic acid decarboxylase 1                       | 16.76 | 3 |
| D3Z0D4 | DNA-binding protein Rfx5                                  | 16.67 | 2 |
| E9Q6C7 | Latrophilin-2                                             | 16.67 | 2 |
| E0CYZ9 | E3 ubiquitin-protein ligase RNF6                          | 15.93 | 2 |
| D3YYQ8 | Dynein, axonemal, heavy chain 10                          | 15.44 | 2 |
| E9PXP7 | Stonin-2                                                  | 14.88 | 2 |
| D3Z2Q3 | Diablo homolog, mitochondrial                             | 14.22 | 2 |
| E9Q8A3 | Phosphatidylinositol 4-kinase beta                        | 14.22 | 2 |
| D3Z7J9 | 60 kDa heat shock protein, mitochondrial                  | 14.11 | 2 |
| E9PXX8 | Macc1                                                     | 13.89 | 2 |
| D3YX99 | Subunit 5, mitochondrial                                  | 13.51 | 5 |
| D6REH1 | Peroxisomal membrane protein 2                            | 13.44 | 2 |
| E9QLA5 | Inverted formin-2                                         | 13.44 | 2 |
| B1AUY7 | N-alpha-acetyltransferase 10                              | 13.39 | 2 |
| D3Z7F0 | L-lactate dehydrogenase                                   | 13.32 | 2 |
| A2AF47 | Dedicator of cytokinesis protein 11                       | 13.22 | 2 |
| D3YYD9 | Gfpt1                                                     | 13.16 | 3 |
| E9Q4F8 | Ankyrin repeat domain 11                                  | 13.16 | 3 |
| D3Z1N2 | RING finger protein 10                                    | 13.15 | 2 |
| E9Q7R9 | WD repeat domain 96                                       | 13.15 | 2 |
| D3Z7D5 | Collagen alpha-2(VI) chain                                | 12.64 | 2 |
| D3YYI9 | Gm7347                                                    | 12.54 | 3 |
| E9Q4H1 | Adenomatous polyposis coli protein                        | 12.54 | 3 |
| E0CYH7 | Filamin A-interacting protein 1-like                      | 12.17 | 2 |
| D3YYK2 | Beta-defensin 30                                          | 11.80 | 3 |
| D3Z2G7 | Histone deacetylase 11                                    | 11.76 | 2 |

|        |                                                       |       |   |
|--------|-------------------------------------------------------|-------|---|
| E9Q813 | Ras-GEF domain-containing family member 1B            | 11.76 | 2 |
| D3YVJ8 | Retinol dehydrogenase 13                              | 11.70 | 2 |
| D3Z460 | Gm1330                                                | 11.66 | 2 |
| D3YU67 | Vacuolar protein sorting-associated protein 8 homolog | 11.61 | 3 |
| E9Q0W7 | cAMP-specific 3',5'-cyclic phosphodiesterase 7B       | 11.61 | 3 |
| E9PWQ6 | Serine/threonine-protein kinase 31                    | 11.58 | 2 |
| E0CY56 | SUMO-interacting motifs containing 1                  | 11.54 | 2 |
| E9Q7G0 | Nuclear mitotic apparatus protein 1                   | 11.38 | 3 |
| Q003Y8 | Uncharacterized protein KIAA2022                      | 11.37 | 4 |
| D3YYY8 | Rho guanine nucleotide exchange factor (GEF) 26       | 11.13 | 2 |
| E9Q512 | Thyroid hormone receptor interactor 11                | 11.13 | 4 |
| B1AV28 | Gm14862                                               | 11.07 | 2 |
| D3Z2E7 | AI607873                                              | 11.07 | 3 |
| E0CXG4 | Greb1                                                 | 10.72 | 2 |
| D6RH44 | NMDA receptor-regulated protein 2                     | 10.61 | 2 |
| D3YZ06 | Heat shock protein beta-1                             | 10.59 | 3 |
| E0CYV9 | Protein 1110002E22Rik                                 | 10.09 | 2 |
| D3YX91 | Gm7682                                                | 10.02 | 2 |
| D3Z061 | Ubiquitin-like modifier-activating enzyme 6           | 9.93  | 3 |
| E9Q640 | RNA-binding protein 26                                | 9.93  | 3 |
| E9QM06 | Telomeric repeat-binding factor 2                     | 9.91  | 2 |
| A2AQA7 | Intron-binding protein aquarius                       | 9.88  | 2 |
| D6RH34 | Phosphatidate phosphatase LPIN2                       | 9.82  | 2 |
| E9PX70 | Collagen alpha-1(XII) chain                           | 9.62  | 2 |
| D3Z7F6 | Cytochrome P450, family 2, subfamily t, polypeptide 4 | 9.57  | 2 |
| E0CY67 | Sodium/hydrogen exchanger 9B1                         | 9.49  | 2 |
| E9QN32 | LIM/homeobox protein Lhx6                             | 9.49  | 2 |
| D3Z4T1 | CUGBP, Elav-like family member 5                      | 9.45  | 2 |
| E9Q9S8 | Glutamine repeat protein 1                            | 9.45  | 2 |
| E9Q1N6 | RasGEF domain family, member 1A                       | 9.41  | 2 |
| D3Z0Q6 | Glycogen [starch] synthase, muscle                    | 9.40  | 2 |
| E9Q7C3 | Plekhg4                                               | 9.39  | 2 |
| D3Z7I5 | RAD51-associated protein 1                            | 9.38  | 2 |
| E9QKX5 | Vacuolar protein sorting-associated protein 13B       | 9.38  | 2 |
| E9QMF5 | Neuron navigator 3                                    | 9.31  | 2 |
| D3YVP6 | Glutathione S-transferase Mu 7                        | 9.27  | 2 |
| E9Q264 | Myosin, heavy chain 15                                | 9.27  | 2 |
| D3Z6W2 | Tyrosine-protein phosphatase non-receptor type        | 9.25  | 2 |
| E9PV87 | TALPID3                                               | 9.24  | 2 |
| E9PVY8 | Microtubule-actin cross-linking factor 1              | 9.18  | 2 |
| E9PWK2 | Vomer nasal 1 receptor 224                            | 9.16  | 2 |
| D3YUE0 | Three prime repair exonuclease 1                      | 9.10  | 2 |
| A2AJG1 | Acyl-CoA-binding domain-containing protein 7          | 9.08  | 2 |
| D3YXJ0 | Diacylglycerol kinase, eta                            | 9.05  | 4 |
| E9PZ36 | Polycystic kidney and hepatic disease 1               | 8.90  | 2 |
| D6RH66 | Transmembrane and TPR repeat-containing protein 4     | 8.82  | 2 |
| E9Q7K7 | Janus kinase and microtubule-interacting protein 3    | 8.65  | 3 |
| E9QLT6 | Aryl hydrocarbon receptor nuclear translocator        | 8.60  | 2 |

|        |                                                          |      |   |
|--------|----------------------------------------------------------|------|---|
| D3Z757 | WD repeat domain 86                                      | 8.50 | 2 |
| D3Z2A3 | Histone demethylase UTY                                  | 8.47 | 2 |
| D3Z6Z5 | Family with sequence similarity 189, member A1           | 8.47 | 3 |
| E9Q7Y3 | Uncharacterized protein ENSP00000471857 homolog          | 8.47 | 2 |
| E9QKE4 | Rab3 GTPase-activating protein non-catalytic subunit     | 8.47 | 3 |
| E9Q9F1 | Kcnq5                                                    | 8.45 | 2 |
| D6RFA3 | Hexokinase-3                                             | 8.42 | 2 |
| E0CYB9 | Mitochondrial fission factor                             | 8.38 | 2 |
| E9QN53 | Lebercilin-like protein                                  | 8.38 | 2 |
| D6RCW6 | V-type proton ATPase subunit C 2                         | 8.34 | 2 |
| A2AHD2 | Protein Kcnk15                                           | 8.32 | 2 |
| D6RGU3 | Dedicator of cytokinesis protein 2                       | 8.29 | 2 |
| E9QLW6 | Microtubule-associated serine/threonine-protein kinase 2 | 8.29 | 2 |
| D6RH37 | Serine/threonine-protein kinase N1                       | 8.25 | 2 |
| D3Z795 | Proteasome assembly chaperone 1                          | 8.13 | 2 |
| E9PW16 | GRIP and coiled-coil domain-containing protein 2         | 8.13 | 2 |
| E9QKS6 | Synaptotagmin-like protein 2                             | 8.13 | 2 |
| D6RG93 | Probable tubulin polyglutamylase TTLL9                   | 8.08 | 2 |
| A2AF67 | Dedicator of cytokinesis protein 11                      | 7.82 | 2 |
| E9Q357 | Gm17673                                                  | 7.82 | 3 |
| D3YVM5 | 60S acidic ribosomal protein P0                          | 7.77 | 3 |
| D3Z3N9 | Nyap2                                                    | 7.77 | 3 |
| E9Q8N1 | Titin                                                    | 7.77 | 3 |
| E9PY76 | Gm4868                                                   | 7.53 | 2 |
| D3Z2W1 | Diacylglycerol kinase, iota                              | 7.27 | 2 |
| E9Q8E3 | ABI gene family, member 3 (NESH) binding protein         | 7.27 | 2 |
| D3YWG0 | 11-cis retinol dehydrogenase                             | 7.21 | 2 |
| E9Q309 | Centrosomal protein 350                                  | 7.21 | 2 |
| D3Z5Q9 | Tropomodulin-4                                           | 7.16 | 2 |
| D3Z3F0 | Lateral-signaling target protein 2 homolog               | 7.12 | 2 |
| A2AM74 | Kinesin-like protein KIF17                               | 7.09 | 2 |
| D3Z2B6 | Vomer nasal 2, receptor 35                               | 7.02 | 2 |
| E9Q804 | Ankyrin repeat domain-containing protein 17              | 7.02 | 2 |
| E9PUU8 | Fibrocystin-L                                            | 7.00 | 2 |
| D6RFS3 | Chloride channel protein 2                               | 6.99 | 2 |
| E9PY18 | Ubiquitin specific peptidase 14                          | 6.91 | 2 |
| D3Z4D4 | 1700064H15Rik                                            | 6.88 | 2 |
| E0CY47 | Plch1                                                    | 6.75 | 2 |
| D3YVU7 | Lysine-specific demethylase 2B                           | 6.74 | 4 |
| E9Q2H1 | E3 ubiquitin-protein ligase UBR5                         | 6.74 | 4 |
| B1AVN8 | Phosphatase and actin regulator 2                        | 6.60 | 2 |
| D3Z440 | COP9 signalosome complex subunit 7a                      | 6.60 | 2 |
| D6RGL4 | Ankyrin repeat domain-containing protein 16              | 6.60 | 2 |
| E9Q8Y0 | Myl2                                                     | 6.60 | 2 |
| D3Z709 | Disks large-associated protein 1                         | 6.47 | 2 |
| D3Z1M7 | Synaptojanin-1                                           | 6.33 | 2 |
| E9Q7Q0 | Mucin-4                                                  | 6.33 | 2 |
| A2AP83 | Fibronectin type III domain containing 3C2               | 6.32 | 2 |

|        |                                                          |      |   |
|--------|----------------------------------------------------------|------|---|
| E9QAU4 | Sickle tail protein                                      | 6.28 | 3 |
| A2ANY6 | Midasin                                                  | 6.24 | 2 |
| D3Z0B2 | Nuclear-interacting partner of ALK                       | 6.20 | 2 |
| E9Q6C1 | Oxysterol-binding protein                                | 6.20 | 2 |
| D3Z0I9 | Rnft2                                                    | 6.16 | 4 |
| E9Q6J4 | Ceacam3                                                  | 6.16 | 4 |
| D3YXG0 | Hemicentin 1                                             | 6.11 | 2 |
| E9PVU7 | cAMP-specific 3',5'-cyclic phosphodiesterase 4D          | 6.08 | 2 |
| E9QQ17 | Lipid phosphate phosphatase-related protein type 2       | 6.08 | 2 |
| E0CZ72 | Kinesin-like protein KIF2A                               | 6.06 | 2 |
| B1AUX2 | Host cell factor 1                                       | 5.89 | 2 |
| D3Z784 | Probable UDP-sugar transporter protein SLC35A5           | 5.84 | 2 |
| E9QKK8 | Probable phospholipid-transporting ATPase 11C            | 5.84 | 2 |
| A2AGR6 | DNA damage-binding protein 2                             | 5.83 | 2 |
| D6RGN2 | Plcd4                                                    | 5.76 | 2 |
| D3YXQ5 | Probable phospholipid-transporting ATPase ID             | 5.75 | 2 |
| D3Z6W1 | Microtubule-associated protein 6                         | 5.75 | 2 |
| E9Q423 | Dysferlin                                                | 5.75 | 2 |
| E9QKD1 | Nucleolar protein 8                                      | 5.75 | 2 |
| D3YV10 | Coiled-coil domain containing 13                         | 5.61 | 2 |
| E9Q1N0 | 4932431P20Rik                                            | 5.61 | 2 |
| D3Z7A8 | WD40 repeat domain 95                                    | 5.57 | 2 |
| D3YXM6 | Yip1 domain family, member 3                             | 5.53 | 2 |
| E9Q3Z5 | Supervillin                                              | 5.53 | 2 |
| D6RFN6 | Caspase 2, apoptosis-related cysteine peptidase          | 5.46 | 2 |
| E9QLJ0 | Cardiomyopathy-associated protein 5                      | 5.46 | 2 |
| D3Z0R4 | Tubby-related protein 2                                  | 5.35 | 3 |
| D3Z576 | Filamin-C                                                | 5.27 | 2 |
| E9QA45 | GTP-binding protein 2                                    | 5.27 | 2 |
| E9Q4N3 | E3 ubiquitin-protein ligase LNX                          | 5.21 | 3 |
| E9QPZ3 | Filaggrin-2                                              | 5.19 | 2 |
| D3YZ35 | Neurofilament medium polypeptide                         | 5.17 | 2 |
| D3Z3M7 | CAP-Gly domain-containing linker protein 1               | 5.03 | 3 |
| E9Q8M8 | Mineralocorticoid receptor                               | 5.03 | 3 |
| D3Z041 | Long-chain-fatty-acid--CoA ligase 1                      | 5.01 | 3 |
| E0CYG5 | Transmembrane protein 191C                               | 4.99 | 2 |
| E9QN87 | Plectin                                                  | 4.99 | 2 |
| E9PXR3 | Sestrin-1                                                | 4.97 | 2 |
| E9Q8S5 | Microtubule-associated serine/threonine-protein kinase 3 | 4.96 | 3 |
| D3Z7A7 | Formin-like protein 3                                    | 4.93 | 2 |
| E9PZ38 | Serine/threonine-protein kinase WNK4                     | 4.93 | 2 |
| E0CYY1 | Anamorsin                                                | 4.86 | 2 |
| D3Z0Z4 | ATP-binding cassette sub-family G member 3               | 4.84 | 2 |
| E9Q793 | 4931429I11Rik                                            | 4.84 | 2 |
| D3YWI1 | Fructose-bisphosphate aldolase                           | 4.77 | 2 |
| D3Z736 | L-lactate dehydrogenase                                  | 4.74 | 2 |
| A2AHW8 | GTPase-activating Rap/Ran-GAP domain-like protein 3      | 4.71 | 2 |
| D3Z4K0 | Ankyrin repeat domain 36                                 | 4.70 | 2 |

|        |                                                        |      |   |
|--------|--------------------------------------------------------|------|---|
| E9PX39 | Adamts14                                               | 4.67 | 2 |
| D3Z7F5 | NACHT, LRR and PYD domains-containing protein 9A       | 4.65 | 3 |
| E9QKV8 | Nrde-2                                                 | 4.65 | 3 |
| E9QMD3 | Zinc finger homeobox protein 3                         | 4.65 | 2 |
| E9PYK6 | Olfactory receptor 1410                                | 4.62 | 2 |
| E9PZ41 | Trafficking protein particle complex subunit 9         | 4.59 | 2 |
| E9Q8N4 | Microtubule-associated tumor suppressor 1 homolog      | 4.52 | 2 |
| E0CXW4 | Histone-lysine N-methyltransferase SUV420H2            | 4.50 | 2 |
| E0CZF7 | Homeobox protein prophet of Pit-1                      | 4.49 | 2 |
| D3YU01 | Plekha1                                                | 4.46 | 4 |
| D3YXX8 | TP53RK-binding protein                                 | 4.40 | 2 |
| D3YZW1 | SLIT-ROBO Rho GTPase-activating protein 1              | 4.40 | 5 |
| E9Q448 | Tropomyosin alpha-1 chain                              | 4.40 | 2 |
| A8DUV1 | Hemoglobin alpha, adult chain 1                        | 4.38 | 2 |
| E9PWB8 | Tubulin polyglutamylase TTLL7                          | 4.38 | 2 |
| D3YXL0 | Coiled-coil domain containing 170                      | 4.35 | 2 |
| E9Q3Y8 | Gm6811                                                 | 4.35 | 2 |
| D3YUC3 | 1700026D08Rik                                          | 4.32 | 8 |
| E9QNY8 | Sacsin                                                 | 4.31 | 2 |
| E9PWG4 | Myosin light chain 1/3, skeletal muscle isoform        | 4.27 | 2 |
| D6RG56 | Round spermatid basic protein 1                        | 4.26 | 2 |
| D6RIK9 | Rpgrip1-like                                           | 4.24 | 2 |
| A2AEP5 | ATP-binding cassette sub-family A member 5             | 4.23 | 2 |
| D3YVU6 | Partner and localizer of BRCA2                         | 4.20 | 2 |
| D3YX59 | Nicotinamide N-methyltransferase                       | 4.18 | 2 |
| E9Q3H7 | Dynein, axonemal, heavy chain 6                        | 4.18 | 2 |
| D3YX16 | N-lysine methyltransferase SETD8                       | 4.15 | 4 |
| D3YVM9 | Setd8                                                  | 4.12 | 2 |
| E0CY48 | Tetratricopeptide repeat protein 39B                   | 4.12 | 2 |
| E9Q1W3 | Nebulin                                                | 4.12 | 2 |
| D3YTW9 | Wnt5b                                                  | 4.10 | 2 |
| E9Q455 | Tropomyosin alpha-1 chain                              | 4.10 | 2 |
| D3YXH8 | Integrin beta 2-like                                   | 4.09 | 2 |
| E9Q3U6 | Killer cell lectin-like receptor subfamily B member 1C | 4.09 | 2 |
| E0CXJ0 | Slco6d1                                                | 4.03 | 2 |
| D3YZH8 | Transducin beta-like protein 2                         | 4.00 | 2 |
| E0CXX5 | Coiled-coil domain containing 19                       | 4.00 | 2 |
| E9Q5D9 | Insulin-like growth factor-binding protein 7           | 4.00 | 2 |
| D3Z5G8 | Disco-interacting protein 2 homolog B                  | 3.98 | 3 |
| E9QAD4 | Coiled-coil domain-containing protein 93               | 3.98 | 3 |
| E9QPR6 | Transmembrane protease serine 13                       | 3.96 | 2 |
| A2ANT9 | Ankyrin repeat and SAM domain-containing protein 6     | 3.90 | 2 |
| D6REH6 | BCL-6 corepressor-like protein 1                       | 3.90 | 2 |
| E9PU96 | Nucleolar pre-ribosomal-associated protein 1           | 3.90 | 2 |
| E9QP09 | Cullin-9                                               | 3.90 | 2 |
| E9PX79 | March10                                                | 3.88 | 2 |
| D3YUU6 | Cornulin                                               | 3.75 | 2 |
| D3Z5G3 | Anion exchange protein 2                               | 3.75 | 3 |

|        |                                                       |      |   |
|--------|-------------------------------------------------------|------|---|
| E9QNW4 | Piezo-type mechanosensitive ion channel component 2   | 3.72 | 2 |
| A2AHQ2 | G-protein-coupled receptor 64                         | 3.58 | 2 |
| D3Z5T8 | 4930407I10Rik                                         | 3.57 | 2 |
| E9QAX1 | Balap2I2                                              | 3.57 | 2 |
| D3Z0L7 | SUN domain-containing protein 1                       | 3.55 | 2 |
| E9Q6J5 | Biorientation of chromosomes in cell division 1-like  | 3.55 | 2 |
| D3Z0G8 | MAGUK p55 subfamily member 4                          | 3.47 | 2 |
| E9Q6D8 | Complement component 6                                | 3.47 | 2 |
| D3Z4T0 | Interleukin-17 receptor B                             | 3.46 | 3 |
| E9PYT0 | Rho GTPase-activating protein 5                       | 3.36 | 2 |
| D3Z4U7 | Testis-expressed sequence 35 protein                  | 3.35 | 3 |
| E0CZ30 | Myosin light chain 1/3, skeletal muscle isoform       | 3.30 | 2 |
| E9PW83 | Fam184a:family with sequence similarity 184, member A | 3.30 | 2 |
| E9QNG1 | Intersectin-2                                         | 3.30 | 2 |
| D3YZR0 | Gm15737                                               | 3.28 | 2 |
| D3Z4D9 | C2 domain-containing protein 3                        | 3.28 | 2 |
| E9Q9B2 | NEDD4 binding protein 2                               | 3.28 | 2 |
| D3YUZ4 | CREB/ATF bZIP transcription factor                    | 3.27 | 2 |
| D6REG6 | PX domain-containing protein 1                        | 3.26 | 2 |
| E9QPI5 | Sister chromatid cohesion protein PDS5 homolog A      | 3.26 | 2 |
| D3Z5W6 | Fatty acyl-CoA reductase 1                            | 3.21 | 2 |
| E9QAZ9 | Vomer nasal 2, receptor 100                           | 3.21 | 2 |
| A2AG09 | RNA-binding protein 41                                | 3.17 | 2 |
| E9Q6T9 | BTB/POZ domain-containing protein KCTD1               | 3.16 | 2 |
| D3YYR3 | 2210418O10Rik                                         | 3.11 | 2 |
| E9PUJ6 | Probable E3 ubiquitin-protein ligase MYCBP2           | 3.10 | 2 |
| E9QPG2 | Polycystic kidney disease protein 1-like 2            | 3.10 | 2 |
| E9QL22 | TatD DNase domain containing 3                        | 3.04 | 2 |
| E9PVU0 | Unconventional myosin-VI                              | 3.03 | 2 |
| E9PXA7 | Cytosolic carboxypeptidase 1                          | 3.01 | 2 |
| D3YY55 | Histone deacetylase complex subunit SAP18             | 2.98 | 3 |
| E9Q456 | Tropomyosin alpha-1 chain                             | 2.98 | 3 |
| E9PYP7 | Trehalase                                             | 2.86 | 2 |
| D3YYC3 | Histone-lysine N-methyltransferase SETDB1             | 2.85 | 3 |
| E9PUA3 | IQ motif and SEC7 domain-containing protein 1         | 2.83 | 2 |
| E9QP46 | Nesprin-2                                             | 2.83 | 2 |
| A2ALV5 | Protein AI481877                                      | 2.76 | 2 |
| E9PYD7 | Kelch repeat and BTB (POZ) domain containing 6        | 2.76 | 2 |
| D3YXT2 | Ribosomal protein L10A, pseudogene 2                  | 2.72 | 2 |
| E9Q444 | Zinc finger and BTB domain containing 21              | 2.72 | 2 |
| E0CZA1 | T-complex protein 1 subunit epsilon                   | 2.68 | 2 |
| D3Z4N8 | Vomer nasal 2, receptor 72                            | 2.66 | 2 |
| E9Q9M0 | Centrosomal protein of 290 kDa                        | 2.66 | 2 |
| E9PW44 | YTH domain containing 1                               | 2.60 | 2 |
| E9PUV7 | Gm872                                                 | 2.56 | 2 |
| E9Q616 | AHNAK nucleoprotein (desmoyokin)                      | 2.56 | 4 |
| D3Z3X6 | Latrophilin-3                                         | 2.49 | 4 |
| D3YYD6 | Aquaporin-9                                           | 2.47 | 2 |

|        |                                                      |      |   |
|--------|------------------------------------------------------|------|---|
| E9Q489 | Calsequestrin                                        | 2.47 | 2 |
| D3YZZ5 | Tmed7                                                | 2.40 | 2 |
| E9Q5L3 | Acadsb                                               | 2.40 | 2 |
| D3YZE8 | Cdca2                                                | 2.35 | 3 |
| E9PUL4 | Pde8b                                                | 2.35 | 2 |
| E9Q559 | Sarcoplasmic/endoplasmic reticulum calcium ATPase 3  | 2.35 | 3 |
| D3YY08 | Tubulin polyglutamylase TTLL4                        | 2.32 | 2 |
| E9Q452 | Tropomyosin alpha-1 chain                            | 2.32 | 2 |
| E9PWG6 | Non-SMC condensin I complex, subunit G               | 2.30 | 2 |
| E9QP99 | Golgin subfamily A member 3                          | 2.26 | 2 |
| E9Q9D8 | ankyrin repeat domain 35                             | 2.24 | 3 |
| D3Z2J3 | Putative ATP-dependent RNA helicase DHX30            | 2.23 | 2 |
| E9Q7S1 | Zinc finger protein 106                              | 2.23 | 3 |
| D3Z3B2 | V-type proton ATPase 16 kDa proteolipid subunit      | 2.22 | 2 |
| D6RIM8 | Harmonin                                             | 2.16 | 2 |
| A2AE98 | WD and tetratricopeptide repeats protein 1           | 2.12 | 2 |
| E9Q7E2 | AT rich interactive domain 2 (ARID, RFX-like)        | 2.11 | 3 |
| D3YWV3 | Differentially-expressed in FDCP 8                   | 2.09 | 4 |
| E9Q390 | Myoferlin                                            | 2.09 | 7 |
| D3Z2L1 | General transcription factor 3C polypeptide 2        | 2.08 | 2 |
| E9Q892 | Lrch3                                                | 2.08 | 2 |
| D3Z6N0 | BB014433                                             | 2.06 | 3 |
| E9Q1K1 | 4933411K20Rik                                        | 1.87 | 2 |
| B1ASL6 | Tumor necrosis factor receptor superfamily member 18 | 1.85 | 2 |
| E9PZ74 | Vomeronasal 2, receptor 7                            | 1.85 | 2 |
| D3Z030 | Leucine-rich repeat-containing protein 16A           | 1.82 | 2 |
| D3Z007 | Interleukin-1 receptor-associated kinase 3           | 1.81 | 3 |
| E9Q5M6 | WD repeat domain 52                                  | 1.81 | 3 |
| E9QQ10 | A-kinase anchor protein 9                            | 1.80 | 2 |
| E9QML5 | Zinc finger protein 638                              | 1.76 | 2 |
| E9Q0D4 | SET binding factor 2                                 | 1.75 | 2 |
| D3Z5A7 | Peroxisome biogenesis factor 1                       | 1.62 | 3 |
| E9QAC0 | StAR-related lipid transfer protein 9                | 1.62 | 3 |
| D3Z0T2 | Dimethylaniline monooxygenase [N-oxide-forming] 1    | 1.60 | 2 |
| E9Q6Y8 | Ubiquitin specific peptidase 31                      | 1.60 | 2 |
| D3Z0I5 | Tripartite motif-containing protein 59               | 1.53 | 2 |
| D3Z5R8 | 40S ribosomal protein S19                            | 1.48 | 3 |
| E9QAH1 | Golgi autoantigen, golgin subfamily b, macrogolgin 1 | 1.48 | 3 |
| E0CZ42 | Fer-1-like 6 (C. elegans)                            | 1.44 | 2 |
| E9PUJ2 | DNA repair protein RAD50                             | 1.44 | 2 |
| D3Z1X5 | Rho GTPase-activating protein 26                     | 1.42 | 2 |
| E9Q7S8 | Vomeronasal 2, receptor 22                           | 1.42 | 2 |
| D3YU32 | Gm362                                                | 1.40 | 3 |
| D3Z533 | GalntI5                                              | 1.40 | 3 |
| E9Q0A4 | Kinesin-like protein KIF21B                          | 1.40 | 3 |
| E9QA22 | Zinc finger protein 644                              | 1.40 | 3 |
| D3Z2S4 | Enolase                                              | 1.38 | 3 |
| E9Q8C5 | Family with sequence similarity 3, member C          | 1.38 | 3 |



|        |                                                        |      |   |
|--------|--------------------------------------------------------|------|---|
| A2AEC2 | Transcription elongation factor A protein-like 3       | 1.24 | 2 |
| D3Z4B5 | Family with sequence similarity 210, member A          | 1.24 | 3 |
| E9QKH0 | CLIP-associating protein 1                             | 1.23 | 2 |
| D6RFE3 | Transmembrane protein 180                              | 1.19 | 2 |
| E9Q555 | E3 ubiquitin-protein ligase RNF213                     | 1.17 | 5 |
| D6RFR7 | DCC-interacting protein 13-beta                        | 0.98 | 2 |
| E9Q7N9 | Dynein, axonemal, heavy chain 11                       | 0.98 | 2 |
| E9QLK7 | Transformation/transcription domain-associated protein | 0.98 | 2 |
| D3Z6P9 | DEAD (Asp-Glu-Ala-Asp) box polypeptide 43              | 0.91 | 2 |
| E9QK83 | Small subunit processome component 20 homolog          | 0.91 | 2 |
| D3Z4A4 | Peroxiredoxin-2                                        | 0.88 | 2 |
| D3YV81 | Sarcolemmal membrane-associated protein                | 0.86 | 2 |
| D3Z667 | Dynein heavy chain 2, axonemal                         | 0.86 | 2 |
| D3Z6P1 | Multifunctional protein ADE2                           | 0.74 | 2 |
| E9QK82 | Myelin protein P0                                      | 0.74 | 2 |
| D3YVW2 | Golgi integral membrane protein 4                      | 0.30 | 5 |

---
