# Supplementary material for: Proteomic Signature of the Murine Intervertebral Disc
Source: PubMed Central journal article supplement (PMC4331544; doi:10.1371/journal.pone.0117807), 2015-02-17
Supplement: pone.0117807.s002.pdf [file pone.0117807.s002.pdf]

**Supplementary Table 2 - Identified proteins within the intervertebral disc.**

| <b>Uniprot<br/>Accession No.</b> | <b>Protein Name</b>                                        | <b>% Coverage</b> | <b>No.<br/>Different<br/>Peptides</b> |
|----------------------------------|------------------------------------------------------------|-------------------|---------------------------------------|
| B2RXU7                           | Chondroitin sulfate synthase 3                             | 97.87             | 2                                     |
| B9EI21                           | Zinc finger matrin type 3                                  | 82.61             | 2                                     |
| B9EKB8                           | Insulin-like growth factor 2 receptor                      | 65.82             | 4                                     |
| P46660                           | Alpha-internexin                                           | 65.82             | 2                                     |
| Q9JIH4                           | Nuclear factor of activated T cells 5                      | 63.37             | 2                                     |
| <b>Q8BSS6</b>                    | <b>Transcription factor SOX-6</b>                          | <b>57.69</b>      | <b>3</b>                              |
| Q91VH3                           | Tropomyosin 2, beta                                        | 57.36             | 3                                     |
| D6Q0F7                           | Cytoplasmic dynein intermediate chain 2 isoform 2.5        | 57.01             | 2                                     |
| Q64343                           | ATP-binding cassette sub-family G member 1                 | 57.01             | 2                                     |
| Q8C0Q3                           | Tetratricopeptide repeat domain 34                         | 50.81             | 2                                     |
| B1AXJ0                           | 5-azacytidine-induced protein 1                            | 50.00             | 2                                     |
| Q505F0                           | Asap1                                                      | 49.28             | 2                                     |
| P59528                           | Taste receptor type 2 member 123                           | 49.28             | 2                                     |
| P61164                           | Alpha-centractin                                           | 49.06             | 2                                     |
| Q6P8J7                           | Creatine kinase S-type, mitochondrial                      | 46.94             | 2                                     |
| A4Q9E4                           | Probable tubulin polyglutamylase TTLL2                     | 46.43             | 2                                     |
| E9PZJ8                           | Activating signal cointegrator 1 complex subunit 3         | 46.10             | 2                                     |
| Q8BYN3                           | Inositol-tetrakisphosphate 1-kinase                        | 45.95             | 2                                     |
| P31725                           | Protein S100-A9                                            | 44.03             | 13                                    |
| P63101                           | 14-3-3 protein zeta/delta                                  | 41.51             | 3                                     |
| B2RRF6                           | Zinc finger protein 518A                                   | 40.94             | 2                                     |
| B7ZND3                           | Avian erythroblastosis virus E-26 (v-ets) oncogene related | 40.41             | 4                                     |
| Q7TQ48                           | Sarcalumenin                                               | 40.11             | 4                                     |
| P40142                           | Transketolase                                              | 39.73             | 12                                    |
| Q5U440                           | Maternal embryonic leucine zipper kinase                   | 39.72             | 2                                     |
| Q8K0Z9                           | Probable G-protein coupled receptor 153                    | 38.60             | 2                                     |
| Q6PAJ3                           | GRB2-associated and regulator of MAPK protein-like         | 38.46             | 2                                     |
| Q0VBN2                           | Dermatan-sulfate epimerase-like protein                    | 38.16             | 2                                     |
| Q9DCC3                           | Coiled-coil domain-containing protein 107                  | 37.50             | 2                                     |
| B2RSN6                           | REST corepressor 3                                         | 37.41             | 2                                     |
| A6ZI46                           | Fructose-bisphosphate aldolase                             | 37.06             | 2                                     |
| E9QMK7                           | Arap3                                                      | 37.06             | 2                                     |
| D9HP81                           | Regulating synaptic membrane exocytosis 2                  | 37.06             | 2                                     |
| Q9D6J4                           | N-terminal EF-hand calcium-binding protein 3               | 36.42             | 2                                     |
| P10639                           | Thioredoxin                                                | 34.09             | 2                                     |
| A2RSS2                           | Carbohydrate sulfotransferase 10                           | 33.95             | 2                                     |
| E9Q165                           | Trpm8                                                      | 33.67             | 3                                     |
| Q02242                           | Programmed cell death protein 1                            | 33.17             | 3                                     |
| Q8CGY6                           | Protein unc-45 homolog B                                   | 31.71             | 3                                     |
| Q9WV42                           | Nuclear receptor coactivator 4                             | 31.06             | 2                                     |
| P60879                           | Synaptosomal-associated protein 25                         | 30.57             | 2                                     |
| Q9D5R3                           | Centrosomal protein of 83 kDa                              | 30.09             | 2                                     |
| P07759                           | Serine protease inhibitor A3K                              | 29.89             | 2                                     |
| A2A864                           | Integrin Beta 4                                            | 29.26             | 2                                     |

|               |                                                        |              |          |
|---------------|--------------------------------------------------------|--------------|----------|
| Q14B66        | Potassium voltage-gated channel, subfamily Q, member 3 | 29.25        | 2        |
| Q9DAM4        | Citrate synthase like                                  | 29.25        | 2        |
| P97864        | Caspase-7                                              | 29.17        | 2        |
| Q5F4S6        | Trpm3                                                  | 29.02        | 2        |
| Q8K2Y2        | Receptor-interacting serine-threonine kinase 3         | 28.87        | 3        |
| Q9WVM2        | Dematin                                                | 28.57        | 2        |
| Q8R4D4        | Signal transducer and activator of transcription 6     | 27.22        | 3        |
| D3YU07        | RAD50 interactor 1, isoform CRA f                      | 26.60        | 6        |
| <b>D3YW52</b> | <b>Alpha-2-macroglobulin</b>                           | <b>26.19</b> | <b>3</b> |
| Q5FWH3        | Grainyhead-like protein 3 homolog                      | 26.10        | 5        |
| A6H694        | Leucine-rich repeat-containing protein 63              | 26.09        | 2        |
| O70343        | PPAR-gamma coactivator 1-alpha                         | 26.09        | 2        |
| A2A9Z0        | Dystrophin                                             | 25.93        | 2        |
| Q0P661        | Proline rich Gla (G-carboxyglutamic acid) 1            | 25.38        | 2        |
| C6EQG1        | Ubiquitin carboxyl-terminal hydrolase 29               | 25.12        | 2        |
| O54949        | Serine/threonine-protein kinase NLK                    | 24.82        | 2        |
| E9QL17        | Serine/threonine-protein kinase MARK1                  | 24.75        | 2        |
| Q8BH44        | Coronin-2B                                             | 24.71        | 2        |
| Q9WV02        | RNA-binding motif protein, X chromosome                | 24.67        | 2        |
| Q4FK59        | Enolase 3, beta muscle                                 | 24.66        | 3        |
| O55226        | Chondroadherin                                         | 24.24        | 2        |
| Q9DCM0        | Persulfide dioxygenase ETHE1, mitochondrial            | 24.22        | 2        |
| P08249        | Malate dehydrogenase, mitochondrial                    | 24.16        | 2        |
| A2A791        | Zinc finger MYM_type protein 4                         | 24.11        | 2        |
| Q3KNG4        | Neuropeptide FF-amide peptide precursor                | 24.09        | 2        |
| B2RWR1        | Protocadherin 20                                       | 23.97        | 2        |
| Q2KHI9        | DNA helicase MCM9                                      | 23.28        | 2        |
| Q00898        | Alpha-1-antitrypsin 1-5                                | 23.08        | 2        |
| Q9D5U0        | Lysophosphatidylcholine acyltransferase 2B             | 22.90        | 2        |
| Q3UGP9        | Leucine-rich repeat-containing protein 58              | 22.89        | 2        |
| B2RY08        | Dedicator of cytokinesis 9                             | 22.64        | 2        |
| P80316        | T-complex protein 1 subunit epsilon                    | 22.61        | 2        |
| P80316        | T-complex protein 1 subunit epsilon                    | 22.61        | 2        |
| Q8VDD5        | Myosin-9                                               | 22.45        | 2        |
| Q45VK6        | Interleukin enhancer binding factor 3                  | 22.06        | 2        |
| P70270        | DNA repair and recombination protein RAD54-like        | 22.04        | 2        |
| Q80XH2        | Interphotoreceptor matrix proteoglycan 2               | 22.03        | 2        |
| P09411        | Phosphoglycerate kinase 1                              | 22.02        | 2        |
| A7TU71        | Shroom2                                                | 21.60        | 2        |
| A2ARV4        | Low-density lipoprotein receptor-related protein 2     | 21.54        | 2        |
| Q80U35        | Rho guanine nucleotide exchange factor (GEF) 17        | 21.16        | 4        |
| Q9ESP5        | Fez family zinc finger protein 2                       | 20.89        | 2        |
| <b>Q04887</b> | <b>Transcription factor SOX-9</b>                      | <b>20.75</b> | <b>3</b> |
| Q80ZE2        | Sialic acid-binding Ig-like lectin 5                   | 20.63        | 2        |
| P99027        | 60S acidic ribosomal protein P2                        | 20.38        | 2        |
| A0JNY8        | RE1-Silencing Transcription Factor                     | 20.20        | 2        |
| Q7TPD5        | Ribosomal protein S6 kinase                            | 20.19        | 2        |
| B1AVI6        | Sushi-repeat-containing protein, X-linked 2            | 20.00        | 3        |
| Q2EY15        | Protogenin                                             | 19.88        | 2        |

|        |                                                              |       |   |
|--------|--------------------------------------------------------------|-------|---|
| Q5SDA5 | Retinal guanylyl cyclase 2                                   | 19.76 | 2 |
| B7ZMQ1 | CD84                                                         | 19.52 | 2 |
| A2ABQ3 | Centrosomal protein of 112 kDa                               | 19.46 | 2 |
| Q8CCJ3 | E3 UFM1-protein ligase 1                                     | 19.35 | 2 |
| Q5VCS6 | Tudor domain-containing protein 5                            | 19.19 | 2 |
| Q3TXI6 | Secreted acidic cysteine rich glycoprotein                   | 19.14 | 2 |
| Q99MX7 | Cat eye syndrome critical region protein 6 homolog           | 18.53 | 2 |
| B7ZN98 | Otoferlin                                                    | 18.49 | 2 |
| B2RPU9 | Neuromedin U receptor 2                                      | 18.47 | 2 |
| Q4FJU1 | Serine (or cysteine) peptidase inhibitor, clade E, member 2  | 18.44 | 3 |
| Q8CIA8 | Uaca                                                         | 18.18 | 2 |
| Q61785 | ORF2                                                         | 17.99 | 2 |
| D3Z750 | Maestro heat-like repeat-containing protein family member 2A | 17.74 | 2 |
| E9QJR6 | Polycystin-1                                                 | 17.73 | 2 |
| D3YU22 | LIM and calponin homology domains-containing protein 1       | 17.67 | 2 |
| D3YU22 | LIM and calponin homology domains-containing protein 1       | 17.67 | 2 |
| E9QK00 | Tight junction protein ZO-1                                  | 17.50 | 2 |
| Q9EP71 | Ankycorbin                                                   | 17.35 | 2 |
| Q6DR98 | Neuregulin-1 type I beta1-a                                  | 17.24 | 5 |
| B2RQL1 | Coiled-coil domain containing 158                            | 17.22 | 2 |
| Q9Z285 | Tektin 1                                                     | 17.21 | 2 |
| Q3U186 | Probable arginine--tRNA ligase, mitochondrial                | 17.15 | 2 |
| Q99K08 | 6-phosphofructokinase                                        | 17.13 | 3 |
| Q3U1F0 | Ligase III, DNA, ATP-dependent                               | 17.09 | 2 |
| Q9D738 | Ankyrin repeat and SOCS box protein 12                       | 16.93 | 2 |
| B2RX00 | RB1-inducible coiled-coil 1                                  | 16.87 | 2 |
| Q9D5T7 | HORMA domain-containing protein 1                            | 16.81 | 2 |
| Q6NZC3 | Solute carrier family 30 (zinc transporter), member 3        | 16.67 | 2 |
| Q7TN79 | A-kinase anchor protein 7 isoform gamma                      | 16.64 | 3 |
| Q9QWT9 | Kinesin-like protein KIFC1                                   | 16.62 | 2 |
| Q6NZR2 | Myb/SANT-like DNA-binding domain-containing protein 2        | 16.55 | 2 |
| B2RWR3 | Coiled-coil domain containing 73                             | 16.38 | 2 |
| Q5FW75 | Actinin alpha 2                                              | 16.31 | 2 |
| Q5PR68 | Centrosomal protein of 112 kDa                               | 16.19 | 2 |
| Q9WU03 | Kunitz-type protease inhibitor 2                             | 16.19 | 2 |
| Q7TSV6 | Putative aspartate aminotransferase, cytoplasmic 2           | 16.18 | 3 |
| Q7TRL9 | Olfactory receptor 745                                       | 15.79 | 2 |
| B9EKQ3 | PR domain containing 2, with ZNF domain                      | 15.63 | 2 |
| A2A7Z8 | Arylacetamide deacetylase-like 3                             | 15.61 | 2 |
| Q71LX8 | Heat shock protein 84b                                       | 15.54 | 2 |
| P56480 | ATP synthase subunit beta, mitochondrial                     | 15.28 | 2 |
| P58873 | Rhomboid-related protein 3                                   | 15.28 | 2 |
| Q3KPE4 | Phospholipase C, zeta 1                                      | 15.20 | 2 |
| A0JP62 | F-box and WD-40 domain protein 13                            | 15.14 | 2 |
| B2BBR8 | Xin actin-binding repeat containing 2                        | 15.10 | 2 |
| Q148R9 | Regulator of G-protein signaling 9-binding protein           | 15.04 | 2 |
| Q7TPV4 | Myb-binding protein 1A                                       | 15.02 | 2 |
| Q9EQ38 | Vomer nasal receptor V1RC5                                   | 15.01 | 2 |
| Q8CEH8 | Profilin                                                     | 14.96 | 2 |

|        |                                                           |       |   |
|--------|-----------------------------------------------------------|-------|---|
| Q9CQL5 | 39S ribosomal protein L18, mitochondrial                  | 14.94 | 2 |
| Q9D3P1 | Trichohyalin-like protein 1                               | 14.94 | 2 |
| Q3TGF2 | Family with sequence similarity 107, member B             | 14.93 | 2 |
| Q14DL3 | Leucine-rich repeat and IQ domain-containing protein 3    | 14.90 | 3 |
| P08553 | Neurofilament medium polypeptide                          | 14.88 | 2 |
| Q14AV0 | Myosin binding protein H                                  | 14.84 | 2 |
| Q91YT9 | 6-phosphogluconate dehydrogenase, decarboxylating         | 14.76 | 3 |
| Q9D9J3 | Actin-related protein T1                                  | 14.73 | 2 |
| Q9CZA6 | Nuclear distribution protein nudE homolog 1               | 14.71 | 2 |
| Q9DBA6 | Peroxisomal leader peptide-processing protease            | 14.64 | 2 |
| B2RWW8 | Myosin, heavy polypeptide 8, skeletal muscle, perinatal   | 14.64 | 2 |
| Q80VZ1 | Calpain 6                                                 | 14.49 | 2 |
| Q3UHI0 | Serine-rich coiled-coil domain-containing protein 2       | 14.22 | 2 |
| Q8R554 | OTU domain-containing protein 7A                          | 14.20 | 2 |
| A2AHD1 | WNT1 inducible signaling pathway protein 2, isoform CRA_a | 14.11 | 2 |
| Q640N8 | Major intrinsic protein of eye lens fiber                 | 14.00 | 2 |
| A1X3U7 | Beta growth arrest specific protein 11                    | 13.98 | 2 |
| P09036 | Serine protease inhibitor Kazal-type 3                    | 13.89 | 2 |
| Q9Z0U9 | Sphingosine 1-phosphate receptor 3                        | 13.87 | 2 |
| A2AQP0 | Myosin-7B                                                 | 13.75 | 2 |
| A8C756 | Thyroid adenoma-associated protein homolog                | 13.72 | 2 |
| A2A6J1 | Troponin T, fast skeletal muscle                          | 13.65 | 2 |
| Q9CYU9 | PRP18 pre-mRNA processing factor 18 homolog (yeast)       | 13.64 | 2 |
| B2RU94 | Olfactory receptor 1115                                   | 13.63 | 2 |
| Q80UL7 | Heart and neural crest derivatives expressed transcript 1 | 13.60 | 4 |
| Q8BI29 | Specifically androgen-regulated gene protein              | 13.56 | 4 |
| Q6T707 | Stearoyl-coenzyme A desaturase 4                          | 13.55 | 6 |
| Q8BJF9 | Charged multivesicular body protein 2b                    | 13.53 | 3 |
| Q14AY4 | Mitogen-activated protein kinase kinase kinase 5          | 13.50 | 2 |
| Q8R5B7 | General transcription factor IIF subunit 1                | 13.47 | 3 |
| Q8R480 | Nuclear pore complex protein Nup85                        | 13.45 | 2 |
| Q78KN5 | Leucine rich repeat containing 40                         | 13.38 | 2 |
| A2AFF9 | Plexin-B3                                                 | 13.35 | 3 |
| Q80UF7 | TIR domain-containing adapter molecule 1                  | 13.25 | 4 |
| Q8BW94 | Dynein heavy chain 3, axonemal                            | 13.23 | 2 |
| A2AF47 | Dedicator of cytokinesis protein 11                       | 13.22 | 2 |
| Q99KR8 | Plasma alpha-L-fucosidase                                 | 13.16 | 2 |
| B2RU58 | G-protein-coupled receptor 115                            | 13.11 | 2 |
| Q6XBG3 | ATP-binding cassette transporter sub-family A member 14   | 13.05 | 2 |
| Q9JI67 | Beta-1,3-galactosyltransferase 5                          | 12.92 | 2 |
| Q9D881 | Cytochrome c oxidase subunit 5B, mitochondrial            | 12.90 | 2 |
| Q9CRY7 | Gdpd1                                                     | 12.88 | 2 |
| Q3TE63 | Peptidyl-prolyl cis-trans isomerase A                     | 12.85 | 2 |
| Q8BKU8 | Transcription factor HES-7                                | 12.84 | 4 |
| Q9QXE7 | F-box-like/WD repeat-containing protein TBL1X             | 12.77 | 2 |
| B1AU57 | Envoplakin                                                | 12.73 | 2 |
| Q8BG58 | Transmembrane prolyl 4-hydroxylase                        | 12.72 | 5 |
| Q6PGB9 | A kinase (PRKA) anchor protein 6                          | 12.68 | 2 |
| E9QKU0 | Intraflagellar transport protein 88 homolog               | 12.64 | 2 |

|         |                                                                                    |       |   |
|---------|------------------------------------------------------------------------------------|-------|---|
| P42859  | Huntingtin                                                                         | 12.59 | 2 |
| Q9Z218  | Dipeptidyl aminopeptidase-like protein 6                                           | 12.55 | 2 |
| Q923C5  | Centromere protein B                                                               | 12.53 | 2 |
| Q8VFI0  | Olfactory receptor 788                                                             | 12.52 | 3 |
| A2AAA9  | C-type mannose receptor 2                                                          | 12.50 | 2 |
| D7RXM0  | GPR155 variant 4                                                                   | 12.50 | 2 |
| A3K GK3 | Fer-1-like protein 4                                                               | 12.41 | 2 |
| Q9QZS8  | SH2 domain-containing protein 3C                                                   | 12.39 | 2 |
| Q8K2W0  | Collagen, type IX, alpha 2                                                         | 12.38 | 3 |
| Q9DCU6  | 39S ribosomal protein L4, mitochondrial                                            | 12.28 | 2 |
| P97457  | Myosin regulatory light chain 2, skeletal muscle isoform                           | 12.23 | 3 |
| Q6PER8  | Myosin VB                                                                          | 12.22 | 2 |
| Q149C8  | Hexokinase 3                                                                       | 12.15 | 2 |
| P60882  | Multiple epidermal growth factor-like domains protein 8                            | 12.09 | 3 |
| Q45VK7  | Dynein cytoplasmic 2 heavy chain 1                                                 | 11.87 | 2 |
| Q8R2X0  | EH-domain containing 2                                                             | 11.83 | 3 |
| Q62429  | Tap1                                                                               | 11.79 | 3 |
| B9EHR5  | Unconventional myosin-VIIb                                                         | 11.75 | 2 |
| Q8CFH0  | Prolactin-like protein C 3, isoform CRA_a                                          | 11.74 | 2 |
| B2RWS3  | Receptor transporter protein 3                                                     | 11.71 | 2 |
| E9Q926  | Serine protease inhibitor A3M                                                      | 11.66 | 2 |
| Q6P5E8  | Diacylglycerol kinase theta                                                        | 11.63 | 2 |
| Q3UFC6  | Desmoglein 3                                                                       | 11.62 | 2 |
| B9EKA3  | Deleted in liver cancer 1                                                          | 11.59 | 2 |
| Q8K3W3  | Cancer susceptibility candidate 3                                                  | 11.58 | 2 |
| O88829  | Lactosylceramide alpha-2,3-sialyltransferase                                       | 11.58 | 2 |
| Q8K0T4  | Katanin p60 ATPase-containing subunit A-like 1                                     | 11.56 | 2 |
| E9QN15  | DNA-dependent protein kinase catalytic subunit                                     | 11.54 | 2 |
| B1PSD9  | cAMP-specific 3',5'-cyclic phosphodiesterase 4D                                    | 11.52 | 2 |
| Q14B51  | UDP-N-acetyl-alpha-D-galactosamine:polypeptide N-acetylgalactosaminyltransferase 5 | 11.50 | 2 |
| Q99NE9  | Pre-B-cell leukemia transcription factor 4                                         | 11.48 | 2 |
| Q8BL66  | Early endosome antigen 1                                                           | 11.47 | 2 |
| B2RS91  | RNA polymerase I-specific transcription initiation factor RRN3                     | 11.39 | 2 |
| Q2T9H5  | Vanin 3                                                                            | 11.39 | 3 |
| B2RWX0  | Myosin, heavy polypeptide 1, skeletal muscle, adult                                | 11.36 | 2 |
| A2AN08  | E3 ubiquitin-protein ligase UBR4                                                   | 11.29 | 2 |
| Q920Q2  | DNA repair protein REV1                                                            | 11.28 | 2 |
| B1AQ77  | Keratin 15, isoform CRA_a                                                          | 11.23 | 2 |
| Q7TRI0  | Olfactory receptor 790                                                             | 11.23 | 4 |
| Q8K0C6  | Kallikrein 1-related peptidase b8                                                  | 11.20 | 2 |
| B7ZP32  | Zinc finger protein 408                                                            | 11.17 | 2 |
| E9QLV2  | Dopey-2                                                                            | 11.17 | 2 |
| Q99PL6  | UBX domain-containing protein 6                                                    | 11.17 | 2 |
| B2RUG8  | Additional sex combs like 2 (Drosophila)                                           | 11.16 | 2 |
| B7ZW99  | Formin 1                                                                           | 11.14 | 2 |
| Q6P3A4  | V-set and immunoglobulin domain-containing protein 8                               | 11.13 | 5 |
| Q99PT1  | Rho GDP-dissociation inhibitor 1                                                   | 11.11 | 2 |
| Q6PHC1  | Enolase 1                                                                          | 11.05 | 2 |

|        |                                                               |       |   |
|--------|---------------------------------------------------------------|-------|---|
| B2RT41 | Zinc finger, C3H1-type containing                             | 11.04 | 2 |
| A5X3G4 | Kinase suppressor of ras 2                                    | 11.03 | 2 |
| E9QMG5 | Sorting nexin-25                                              | 11.02 | 2 |
| P97298 | Pigment epithelium-derived factor                             | 11.00 | 6 |
| Q3TLN1 | Peroxisomal biogenesis factor 12, isoform CRA_a               | 10.95 | 2 |
| Q2TBA4 | Basonuclin 2                                                  | 10.91 | 2 |
| A2ADZ8 | IQ domain-containing protein C                                | 10.90 | 2 |
| Q68FM6 | Leucine rich repeat and fibronectin type III, extracellular 2 | 10.89 | 2 |
| Q3TFK5 | G-patch domain-containing protein 4                           | 10.87 | 2 |
| Q5RKV3 | Phosphoglycerate kinase 2                                     | 10.82 | 2 |
| Q05DV1 | NADPH--cytochrome P450 reductase                              | 10.78 | 2 |
| Q155P7 | Leucine, glutamic acid, lysine family 1 protein               | 10.75 | 2 |
| Q8C1E7 | Transmembrane protein 120A                                    | 10.71 | 3 |
| B7ZN53 | Armadillo repeat containing 3                                 | 10.68 | 2 |
| B7NZ86 | Beta-1,4-galactosyltransferase                                | 10.65 | 2 |
| B9EIZ9 | NLR family, pyrin domain containing 9B                        | 10.62 | 2 |
| Q9JL95 | Proteoglycan 3                                                | 10.60 | 2 |
| P48036 | Annexin A5                                                    | 10.57 | 2 |
| Q8CD92 | Tetratricopeptide repeat protein 27                           | 10.54 | 2 |
| Q9CWX3 | N-lysine methyltransferase SETD6                              | 10.54 | 2 |
| Q9ES82 | Popeye domain-containing protein 2                            | 10.54 | 2 |
| A2ALD8 | LIM homeobox protein 3                                        | 10.52 | 2 |
| Q8BH59 | Calcium-binding mitochondrial carrier protein Aralar1         | 10.52 | 4 |
| Q3UKC1 | Tax1-binding protein 1 homolog                                | 10.51 | 2 |
| Q8K2Q9 | Shootin-1                                                     | 10.50 | 3 |
| Q3V036 | Coiled-coil domain-containing protein 27                      | 10.49 | 3 |
| Q7TML3 | Solute carrier family 35 member F2                            | 10.47 | 2 |
| Q91YX0 | Thymocyte selection associated family member 2                | 10.43 | 3 |
| Q3THK7 | GMP synthase [glutamine-hydrolyzing]                          | 10.41 | 2 |
| Q6P9J5 | KN motif and ankyrin repeat domain-containing protein 4       | 10.39 | 3 |
| B2RXR2 | Pik3r4                                                        | 10.36 | 2 |
| B2RXT8 | AT rich interactive domain 4A (RBP1-like)                     | 10.35 | 2 |
| Q8R420 | ATP-binding cassette sub-family A member 3                    | 10.27 | 3 |
| A9C437 | Chloride channel protein 2                                    | 10.24 | 2 |
| A6PWV7 | Lysosomal amino acid transporter 1 homolog                    | 10.22 | 2 |
| E9QLS8 | ATR-interacting protein                                       | 10.20 | 2 |
| B2RY59 | Neuralized homolog 4 (Drosophila)                             | 10.19 | 2 |
| Q91VJ2 | Protein kinase C delta-binding protein                        | 10.19 | 3 |
| Q05D44 | Eukaryotic translation initiation factor 5B                   | 10.18 | 2 |
| Q0P520 | NLR family, pyrin domain containing 4C                        | 10.14 | 2 |
| Q8BFX3 | BTB/POZ domain-containing protein KCTD3                       | 10.12 | 2 |
| Q01237 | 3-hydroxy-3-methylglutaryl-coenzyme A reductase               | 10.11 | 2 |
| Q3UQU0 | Bromodomain-containing protein 9                              | 10.10 | 2 |
| Q6PGC1 | ATP-dependent RNA helicase Dhx29                              | 10.09 | 4 |
| A2AL17 | Rho GTPase-activating protein 11A                             | 10.07 | 2 |
| Q14DK8 | Phospholipase A2, group IVD                                   | 10.06 | 3 |
| Q7TS23 | Olfactory receptor 251                                        | 10.06 | 3 |
| Q3UPP8 | Centrosomal protein of 63 kDa                                 | 10.02 | 2 |
| Q5SV85 | Synergin gamma                                                | 10.01 | 5 |

|               |                                                                 |             |          |
|---------------|-----------------------------------------------------------------|-------------|----------|
| Q8R3C6        | RNA binding motif protein 19                                    | 10.00       | 2        |
| Q8K3V4        | Protein-arginine deiminase type-6                               | 9.94        | 2        |
| Q61982        | Neurogenic locus notch homolog protein 3                        | 9.93        | 4        |
| Q0P678        | Zinc finger CCCH domain-containing protein 18                   | 9.91        | 3        |
| P68368        | Tubulin alpha-4A chain                                          | 9.86        | 2        |
| Q66JW2        | Golgi autoantigen, golgin subfamily a, 1                        | 9.86        | 2        |
| Q8R1T2        | Cullin 4A                                                       | 9.84        | 2        |
| A9P6P9        | Testis-specific serine/threonine protein kinase 5 variant delta | 9.78        | 2        |
| Q9QZA0        | Carbonic anhydrase 5B, mitochondrial                            | 9.74        | 2        |
| O88990        | Alpha-actinin-3                                                 | 9.71        | 2        |
| D5G1T0        | Ankyrin repeat domain 33, isoform CRA_c                         | 9.68        | 2        |
| Q0P543        | Gastric inhibitory polypeptide receptor                         | 9.65        | 2        |
| A8DUL5        | Hemoglobin, beta adult major chain                              | 9.62        | 2        |
| Q8BW49        | Tetratricopeptide repeat protein 12                             | 9.62        | 3        |
| A8DUL5        | Hemoglobin, beta adult major chain                              | 9.62        | 2        |
| P03995        | Glial fibrillary acidic protein                                 | 9.62        | 2        |
| B7ZWK2        | Myotubularin-related protein 5                                  | 9.61        | 2        |
| Q67E05        | Bactericidal permeability-increasing protein                    | 9.61        | 6        |
| Q6P5U7        | Kiaa1239                                                        | 9.59        | 6        |
| A2SW42        | Zinc finger protein 462                                         | 9.57        | 2        |
| Q3THE6        | Ferritin                                                        | 9.57        | 2        |
| B2RT12        | Ubiquitin specific peptidase 37                                 | 9.52        | 2        |
| Q9CQT1        | Methylthioribose-1-phosphate isomerase                          | 9.52        | 2        |
| C0LQ88        | Syncoilin isoform 3                                             | 9.48        | 2        |
| Q7TS72        | Inositol-trisphosphate 3-kinase C                               | 9.47        | 2        |
| Q920R0        | Amyotrophic lateral sclerosis 2 (juvenile)                      | 9.45        | 3        |
| Q6PIJ4        | Nuclear factor related to kappa-B-binding protein               | 9.40        | 2        |
| E9QM11        | Microtubule-associated protein 1B                               | 9.35        | 2        |
| Q6PCP7        | Probable G-protein coupled receptor 156                         | 9.34        | 2        |
| Q6PDF3        | SV2 related protein homolog (rat)-like                          | 9.31        | 3        |
| Q8K2I4        | Beta-mannosidase                                                | 9.31        | 3        |
| Q9D2L5        | Inactive carboxypeptidase-like protein X2                       | 9.31        | 2        |
| Q8BGV8        | Mitochondrial dynamic protein MID51                             | 9.29        | 2        |
| P59111        | Potassium voltage-gated channel subfamily H member 8            | 9.27        | 2        |
| Q14DP5        | Catenin (Cadherin associated protein), alpha 3                  | 9.27        | 3        |
| Q5DTI8        | Extended synaptotagmin-3                                        | 9.27        | 3        |
| E9QKD7        | Dynein heavy chain 5, axonemal                                  | 9.25        | 2        |
| A2AKB9        | DDB1- and CUL4-associated factor 10                             | 9.23        | 2        |
| Q9QZ67        | Protein phosphatase 1D                                          | 9.23        | 2        |
| <b>Q62059</b> | <b>Versican core protein</b>                                    | <b>9.20</b> | <b>2</b> |
| O08850        | Regulator of G-protein signaling 5                              | 9.18        | 2        |
| Q8C3L1        | Ssu-2 homolog (C. elegans)                                      | 9.16        | 3        |
| O88783        | Coagulation factor V                                            | 9.16        | 2        |
| B7ZNF8        | Chromodomain helicase DNA binding protein 9                     | 9.15        | 2        |
| A6H5W2        | Coiled-coil domain-containing protein 87                        | 9.13        | 2        |
| <b>P11087</b> | <b>Collagen alpha-1(I) chain</b>                                | <b>9.11</b> | <b>2</b> |
| Q64092        | Transcription factor E3                                         | 9.09        | 3        |
| A2AJG1        | Acyl-CoA-binding domain-containing protein 7                    | 9.08        | 2        |
| D6CHX5        | Hepatoma-derived growth factor-related protein 2                | 9.06        | 2        |

|        |                                                               |      |   |
|--------|---------------------------------------------------------------|------|---|
| E9QL35 | Alpha-kinase 2                                                | 9.06 | 2 |
| Q80ZJ6 | Zyg-11 related, cell cycle regulator                          | 9.02 | 2 |
| Q497V3 | La ribonucleoprotein domain family, member 2                  | 8.96 | 3 |
| Q9WVA4 | Transgelin-2                                                  | 8.94 | 2 |
| Q9WTU0 | Lysine-specific demethylase PHF2                              | 8.92 | 2 |
| P28184 | Metallothionein-3                                             | 8.90 | 2 |
| Q5SXY1 | Cytospin-B                                                    | 8.86 | 2 |
| Q62504 | Msx2-interacting protein                                      | 8.86 | 2 |
| B9EHV0 | Leucine rich repeat containing 7                              | 8.84 | 2 |
| O54984 | ArsA arsenite transporter, ATP-binding, homolog 1 (bacterial) | 8.84 | 2 |
| P62897 | Cytochrome c, somatic                                         | 8.84 | 2 |
| E9QM01 | E3 SUMO-protein ligase RanBP2                                 | 8.82 | 2 |
| Q8K448 | ATP-binding cassette sub-family A member 5                    | 8.81 | 2 |
| Q9R269 | Periplakin                                                    | 8.81 | 2 |
| B7ZWG4 | Tripartite motif-containing 40                                | 8.77 | 2 |
| Q8K0Z5 | Tropomyosin 3, gamma                                          | 8.74 | 2 |
| B5LBC3 | RAD51D transcript variant delta 9,10                          | 8.73 | 2 |
| Q6P8I3 | WD repeat domain 70                                           | 8.72 | 3 |
| Q7TS74 | Cytoskeleton-associated protein 2-like                        | 8.72 | 4 |
| Q8BNJ3 | Nicotinamide nucleotide adenyltransferase 2                   | 8.72 | 2 |
| Q5SUR0 | Phosphoribosylformylglycinamide synthase                      | 8.68 | 2 |
| Q505K2 | Family with sequence similarity 160, member A1                | 8.67 | 4 |
| D3Z1J2 | Coiled-coil domain-containing protein 112                     | 8.65 | 3 |
| Q8R4G5 | Truncated N-acetylglucosaminyltransferase V                   | 8.64 | 3 |
| B1ARH0 | Hypermethylated in cancer 1 protein                           | 8.59 | 2 |
| Q059Q1 | WD repeat-containing protein 7                                | 8.55 | 2 |
| C6EQH1 | ASL1/Fgf17 fusion protein                                     | 8.54 | 2 |
| Q9JI58 | Retinoic acid early-inducible protein 1-delta                 | 8.54 | 2 |
| P70670 | Naca                                                          | 8.53 | 2 |
| Q8VC03 | Echinoderm microtubule-associated protein-like 3              | 8.51 | 2 |
| Q99N99 | 3-oxo-5-alpha-steroid 4-dehydrogenase 2                       | 8.49 | 2 |
| E9QPW5 | Kinesin-like protein KIF20B                                   | 8.48 | 2 |
| P70351 | Histone-lysine N-methyltransferase EZH1                       | 8.47 | 4 |
| Q8K0M3 | Sorbin and SH3 domain containing 3                            | 8.44 | 3 |
| A2RRJ0 | Desmoglein-2                                                  | 8.42 | 2 |
| B2RTP7 | Keratin 2                                                     | 8.41 | 3 |
| Q8CGD2 | Cysteine-rich secretory protein LCCL domain-containing 1      | 8.40 | 2 |
| Q9WUU9 | 80 kDa MCM3-associated protein                                | 8.39 | 2 |
| Q80W71 | Pleckstrin homology domain-containing family A member 8       | 8.39 | 4 |
| Q149S1 | Tektin 4                                                      | 8.38 | 2 |
| Q8C3Y4 | Kinetochores-associated protein 1                             | 8.38 | 3 |
| Q8CJF7 | AT hook containing transcription factor 1                     | 8.38 | 3 |
| Q9JHD1 | Histone acetyltransferase KAT2B                               | 8.38 | 2 |
| B7ZWL7 | Leucine rich repeat containing 36                             | 8.36 | 2 |
| P53569 | CCAAT/enhancer-binding protein zeta                           | 8.33 | 3 |
| Q6DIB5 | Multiple epidermal growth factor-like domains protein 10      | 8.30 | 2 |
| Q08EK4 | Keratin 77                                                    | 8.29 | 2 |
| Q01853 | Transitional endoplasmic reticulum ATPase                     | 8.28 | 2 |
| Q9Z1W9 | STE20/SPS1-related proline-alanine-rich protein kinase        | 8.27 | 2 |



|        |                                                              |      |   |
|--------|--------------------------------------------------------------|------|---|
| Q9ESC5 | GTPase ERA-W                                                 | 8.24 | 2 |
| Q62392 | Pleckstrin homology-like domain family A member 1            | 8.19 | 2 |
| B9EIW5 | Nuclear receptor coactivator 7                               | 8.17 | 2 |
| Q920P3 | Deleted in bladder cancer protein 1 homolog                  | 8.17 | 3 |
| Q8R2C5 | Vomer nasal receptor V1RC29                                  | 8.17 | 2 |
| O88623 | Ubiquitin carboxyl-terminal hydrolase 2                      | 8.13 | 2 |
| Q5SWY7 | Family with sequence similarity 83, member G                 | 8.13 | 3 |
| B7ZP07 | Ubiquitin specific peptidase, pseudogene (USP17 homolog)     | 8.10 | 2 |
| B9EIV3 | Calcium channel, voltage-dependent, alpha 2/delta subunit 4  | 8.09 | 2 |
| Q8R4N0 | Citrate lyase subunit beta-like protein, mitochondrial       | 8.08 | 3 |
| Q8VG71 | Olfactory receptor 907                                       | 8.08 | 2 |
| Q8VDE8 | Nuclear receptor co-repressor 1                              | 8.07 | 2 |
| B2RWW0 | T-cell activation Rho GTPase-activating protein              | 8.05 | 2 |
| Q5SSZ5 | Tensin-3                                                     | 8.03 | 3 |
| B7ZNF6 | Catenin (cadherin associated protein), delta 2               | 7.96 | 2 |
| Q80XT6 | Lipin 1                                                      | 7.96 | 3 |
| Q8K4L2 | Supervillin                                                  | 7.93 | 3 |
| Q8K4L2 | Supervillin                                                  | 7.93 | 3 |
| Q61115 | Patched homolog 1                                            | 7.91 | 2 |
| C5H7S5 | Vascular endothelial growth factor receptor 2                | 7.90 | 2 |
| Q8VIN7 | Cardiac triadin isoform 3                                    | 7.90 | 3 |
| B1AR51 | Dynein, axonemal, heavy chain 9                              | 7.88 | 2 |
| Q61903 | Myeloid secondary granule protein                            | 7.87 | 3 |
| Q8VDN9 | Coiled-coil domain containing 21                             | 7.83 | 3 |
| Q8BHI4 | Kelch repeat and BTB domain-containing protein 3             | 7.76 | 2 |
| B2RXW8 | Ppfia1 protein                                               | 7.74 | 2 |
| P62192 | 26S protease regulatory subunit 4                            | 7.73 | 2 |
| Q3ZAT5 | Onecut2 protein                                              | 7.73 | 2 |
| Q3ZAT5 | Onecut2 protein                                              | 7.73 | 2 |
| Q8BGU5 | Cyclin-Y                                                     | 7.72 | 2 |
| B2RXA1 | Plcxd2                                                       | 7.69 | 2 |
| Q61769 | Ki-67 protein                                                | 7.69 | 2 |
| Q09XV5 | Chromodomain-helicase-DNA-binding protein 8                  | 7.67 | 2 |
| Q00941 | GM-CSF-R-alpha                                               | 7.66 | 3 |
| Q7M6Z4 | Kinesin-like protein KIF27                                   | 7.66 | 3 |
| A0JNY3 | Gephyrin                                                     | 7.65 | 2 |
| Q8CDC7 | Zinc finger and BTB domain-containing protein 9              | 7.64 | 2 |
| Q9WV35 | Probable C->U-editing enzyme APOBEC-2                        | 7.59 | 2 |
| P09066 | Homeobox protein engrailed-2                                 | 7.53 | 2 |
| Q499F8 | Zinc finger protein 445                                      | 7.52 | 3 |
| Q7TMQ7 | WD repeat-containing protein 91                              | 7.52 | 3 |
| Q8VHQ2 | Suppressor of cytokine signaling 7                           | 7.52 | 3 |
| Q8VI46 | Canalicular multispecific organic anion transporter 1        | 7.51 | 3 |
| B2RY84 | Kinesin family member 14                                     | 7.47 | 3 |
| A5J0L5 | Interleukin 21                                               | 7.47 | 2 |
| Q2TAW4 | Myosin, heavy polypeptide 6, cardiac muscle, alpha           | 7.42 | 3 |
| Q8VGG7 | Olfactory receptor 1282                                      | 7.40 | 3 |
| Q75WC0 | DNA polymerase subunit gamma-1                               | 7.35 | 3 |
| Q922Y0 | Dual specificity tyrosine-phosphorylation-regulated kinase 3 | 7.34 | 2 |

|               |                                                               |             |          |
|---------------|---------------------------------------------------------------|-------------|----------|
| Q8CH25        | SAFB-like transcription modulator                             | 7.32        | 3        |
| Q49715        | Late cornified envelope 3A                                    | 7.31        | 3        |
| Q9D8S3        | ADP-ribosylation factor GTPase-activating protein 3           | 7.31        | 2        |
| B2RY58        | Hyperpolarization-activated, cyclic nucleotide-gated K+ 4     | 7.30        | 3        |
| Q9JI44        | DNA methyltransferase 1-associated protein 1                  | 7.24        | 2        |
| Q8K566        | Cysteine sulfinic acid decarboxylase                          | 7.23        | 3        |
| A2AQ50        | Solute carrier family 12 member 1                             | 7.22        | 2        |
| P43142        | G-protein coupled receptor 182                                | 7.21        | 2        |
| B7ZWG5        | Coiled-coil domain containing 60                              | 7.20        | 2        |
| Q6P5H2        | Nestin                                                        | 7.20        | 3        |
| Q8BWF0        | Succinate-semialdehyde dehydrogenase, mitochondrial           | 7.19        | 4        |
| B7ZNX6        | ErbB2 interacting protein                                     | 7.17        | 2        |
| Q14CH0        | Family with sequence similarity 171, member B                 | 7.17        | 3        |
| Q3U319        | E3 ubiquitin-protein ligase BRE1B                             | 7.14        | 2        |
| Q924W5        | Structural maintenance of chromosomes protein 6               | 7.11        | 2        |
| Q99JX6        | Annexin A6                                                    | 7.10        | 2        |
| Q9CRT8        | Exportin-T                                                    | 7.08        | 2        |
| A2BGH0        | BPI fold-containing family B member 4                         | 7.07        | 2        |
| B2RXZ4        | Kcn10a                                                        | 7.00        | 2        |
| B2RY11        | ATP-binding cassette, sub-family A (ABC1), member 12          | 7.00        | 2        |
| E9QPI0        | HEAT repeat-containing protein 5A                             | 7.00        | 2        |
| Q7M6Z8        | Kinesin light chain 1F                                        | 6.99        | 3        |
| Q8R1Q3        | Angiotensin-related protein 7                                 | 6.96        | 2        |
| Q8VGD0        | Olfactory receptor 25                                         | 6.96        | 2        |
| Q5DTY9        | BTB/POZ domain-containing protein KCTD16                      | 6.93        | 2        |
| Q9WU22        | Tyrosine-protein phosphatase non-receptor type 4              | 6.92        | 2        |
| P0C5J4        | Probable G-protein coupled receptor 52                        | 6.91        | 2        |
| Q5SSG4        | Growth arrest-specific 2 like 1                               | 6.91        | 2        |
| Q9ER73        | Elongator complex protein 4                                   | 6.91        | 2        |
| <b>Q62234</b> | <b>Myomesin-1</b>                                             | <b>6.90</b> | <b>2</b> |
| Q3MI48        | Junctional sarcoplasmic reticulum protein 1                   | 6.88        | 2        |
| B9EKE4        | Periphilin 1                                                  | 6.87        | 2        |
| Q6R5P3        | Zinc finger protein 677                                       | 6.84        | 4        |
| Q8N7N5        | DDB1- and CUL4-associated factor 8                            | 6.84        | 2        |
| Q91Z67        | SLIT-ROBO Rho GTPase-activating protein 2                     | 6.83        | 2        |
| Q7TNB8        | Strawberry notch homolog 2                                    | 6.80        | 2        |
| Q4VAA2        | Carnitine deficiency-associated gene expressed in ventricle 3 | 6.79        | 3        |
| Q8K087        | G-protein coupled receptor 1                                  | 6.79        | 2        |
| Q3URU2        | Paternally-expressed gene 3 protein                           | 6.78        | 2        |
| Q80YP3        | Chromosome-associated kinesin KIF4                            | 6.77        | 2        |
| Q80U57        | Regulating synaptic membrane exocytosis protein 3             | 6.77        | 4        |
| <b>Q3UXK8</b> | <b>Biglycan</b>                                               | <b>6.76</b> | <b>2</b> |
| Q91YD6        | Villin-like protein                                           | 6.76        | 3        |
| Q80W93        | Hydrocephalus-inducing protein                                | 6.75        | 2        |
| B9EJA6        | Tubulin tyrosine ligase-like family, member 6                 | 6.74        | 2        |
| Q61193        | Ral guanine nucleotide dissociation stimulator-like 2         | 6.73        | 3        |
| C3S7Q6        | Ojoplano variant B                                            | 6.71        | 2        |
| Q059P4        | Filamin A interacting protein 1                               | 6.71        | 2        |
| Q76HP3        | Transmembrane protein 132D                                    | 6.70        | 4        |

|        |                                                             |      |   |
|--------|-------------------------------------------------------------|------|---|
| Q62000 | Mimecan                                                     | 6.69 | 5 |
| Q14C50 | Solute carrier family 27 (Fatty acid transporter), member 6 | 6.66 | 3 |
| Q52KG5 | Kinesin-like protein KIF26A                                 | 6.66 | 3 |
| Q9CX00 | Increased sodium tolerance 1 homolog (yeast)                | 6.65 | 2 |
| Q3B807 | Transcription elongation regulator 1-like protein           | 6.63 | 2 |
| B7ZMT5 | Multimerin 1                                                | 6.60 | 2 |
| E9QLR6 | Serine/threonine-protein kinase SMG1                        | 6.60 | 2 |
| Q9DBD2 | E3 ubiquitin-protein ligase MARCH8                          | 6.60 | 2 |
| Q0VGI9 | Gata5 protein                                               | 6.58 | 2 |
| B7ZNW9 | Slit homolog 2 (Drosophila)                                 | 6.55 | 2 |
| A1L343 | Transglutininase 3                                          | 6.51 | 2 |
| B2RU69 | CUB and zona pellucida-like domain-containing protein 1     | 6.51 | 2 |
| Q8BML1 | Protein-methionine sulfoxide oxidase MICAL2                 | 6.49 | 3 |
| B7ZNK9 | Spermatogenesis associated 5                                | 6.48 | 2 |
| B2RWX1 | Rho GTPase activating protein 21                            | 6.47 | 2 |
| Q91W97 | Hexokinase domain containing 1                              | 6.47 | 3 |
| Q9EQW6 | Oligodendrocyte transcription factor 2                      | 6.47 | 2 |
| B9EJ52 | ATPase, class V, type 10D                                   | 6.46 | 2 |
| E2IUN6 | Shugoshin-like 2B                                           | 6.45 | 2 |
| B2RXY1 | Spock1                                                      | 6.42 | 2 |
| Q05A56 | Hyaluronidase-4                                             | 6.40 | 2 |
| Q8BXV2 | Bri3 binding protein                                        | 6.40 | 3 |
| Q8CI43 | Myosin light chain 6B                                       | 6.39 | 3 |
| D3Z0W5 | Inactive phospholipase C-like protein 1                     | 6.38 | 2 |
| Q8CGY8 | Ogt                                                         | 6.36 | 2 |
| Q6PDB6 | Prolactin-2C3                                               | 6.34 | 4 |
| Q76LL6 | FH1/FH2 domain-containing protein 3                         | 6.33 | 2 |
| P56384 | ATP synthase lipid-binding protein, mitochondrial           | 6.32 | 3 |
| Q8C0S1 | DIS3 mitotic control homolog ( <i>S. cerevisiae</i> )-like  | 6.31 | 2 |
| B2RUG6 | Dedicator of cytokinesis 4                                  | 6.30 | 2 |
| Q6PFX2 | BEN domain-containing protein 6                             | 6.26 | 2 |
| Q5SX39 | Myosin-4                                                    | 6.26 | 3 |
| B7ZND5 | Purinergic receptor P2X, ligand-gated ion channel, 1        | 6.23 | 2 |
| A2AIM4 | Tropomyosin beta chain                                      | 6.21 | 2 |
| P47856 | Glutamine fructose-6-phosphate amidotransferase 1           | 6.21 | 2 |
| A2ALI5 | Adherens junction-associated protein 1                      | 6.20 | 2 |
| Q8QZR5 | Alanine aminotransferase 1                                  | 6.17 | 3 |
| Q921I6 | SH3 domain-binding protein 4                                | 6.14 | 2 |
| P47810 | Wee1-like protein kinase                                    | 6.11 | 2 |
| Q571C7 | Transcription factor TFIIIB component B" homolog            | 6.11 | 2 |
| Q7TNU9 | Regulator of G-protein signaling 16                         | 6.09 | 5 |
| Q9EST3 | Eukaryotic translation initiation factor 4E transporter     | 6.09 | 2 |
| Q7TSZ1 | Xeroderma pigmentosum, complementation group C              | 6.09 | 4 |
| E9QNJ2 | Leucine-rich repeat serine/threonine-protein kinase 2       | 6.06 | 2 |
| Q7M710 | Taste receptor type 2 member 125                            | 6.05 | 3 |
| Q5ISE2 | Zinc finger protein 36, C3H1 type-like 3                    | 6.04 | 2 |
| Q8R0Z4 | Sorting nexin 6                                             | 6.04 | 3 |
| Q5ISE2 | Zinc finger protein 36, C3H1 type-like 3                    | 6.04 | 2 |
| Q8CDK3 | IQ and ubiquitin-like domain-containing protein             | 6.02 | 3 |

|               |                                                              |             |          |
|---------------|--------------------------------------------------------------|-------------|----------|
| B1ATT5        | Ketosamine-3-kinase                                          | 6.01        | 2        |
| B2KFW1        | Zinc finger and SCAN domain-containing protein 20            | 6.01        | 2        |
| P60867        | 40S ribosomal protein S20                                    | 6.01        | 2        |
| Q3U452        | ATP synthase subunit alpha                                   | 6.01        | 2        |
| Q3V110        | Lysozyme g-like protein 2                                    | 5.99        | 3        |
| Q8BI72        | CDKN2A-interacting protein                                   | 5.95        | 2        |
| Q8BKY8        | mTERF domain-containing protein 3, mitochondrial             | 5.95        | 2        |
| E9QKZ9        | Proline-rich transmembrane protein 4                         | 5.94        | 2        |
| D3Z7P3        | Glutaminase kidney isoform, mitochondrial                    | 5.94        | 2        |
| Q8K2G3        | DiGeorge syndrome critical region gene 2                     | 5.93        | 3        |
| Q148W1        | Solute carrier organic anion transporter family, member 5A1  | 5.91        | 2        |
| Q8K2N9        | Annexin A8                                                   | 5.91        | 2        |
| A3KGI4        | Cancer susceptibility candidate 5                            | 5.89        | 2        |
| <b>Q61221</b> | <b>Hypoxia-inducible factor 1-alpha</b>                      | <b>5.77</b> | <b>3</b> |
| Q80U56        | Late secretory pathway protein AVL9 homolog                  | 5.75        | 3        |
| Q6ZQH8        | Nucleoporin NUP188 homolog                                   | 5.74        | 5        |
| Q8R4E6        | Purine-rich element-binding protein gamma                    | 5.74        | 2        |
| Q9QZ83        | Gamma actin-like protein                                     | 5.72        | 2        |
| Q8BKT2        | Transcription factor HES-7                                   | 5.70        | 4        |
| B2RPV0        | Dmrta1                                                       | 5.69        | 2        |
| B2RXX1        | Centrosomal protein 110                                      | 5.69        | 2        |
| P70277        | Alpha-N-acetylgalactosaminide alpha-2,6-sialyltransferase 2  | 5.68        | 2        |
| B2RUJ4        | ATPase family, AAA domain containing 5                       | 5.67        | 2        |
| Q8BL06        | Inactive ubiquitin carboxyl-terminal hydrolase 54            | 5.67        | 3        |
| Q9EPU0        | Regulator of nonsense transcripts 1                          | 5.67        | 2        |
| A7XUZ6        | Selection and upkeep of intraepithelial T-cells protein 6    | 5.67        | 2        |
| B1AWS8        | Angiopoietin-1 receptor                                      | 5.65        | 2        |
| A2AM05        | Centlein                                                     | 5.64        | 2        |
| Q05D38        | RAB27b, member RAS oncogene family                           | 5.63        | 2        |
| Q9Z247        | Peptidyl-prolyl cis-trans isomerase FKBP9                    | 5.63        | 2        |
| Q7M6Y6        | Maestro heat-like repeat-containing protein family member 2B | 5.62        | 4        |
| Q640L5        | Coiled-coil domain-containing protein 18                     | 5.60        | 3        |
| B2RY18        | FERM and PDZ domain containing 1                             | 5.58        | 2        |
| Q0V930        | Talin 1                                                      | 5.58        | 2        |
| Q80ZQ0        | Sperm acrosome membrane-associated protein 4                 | 5.58        | 4        |
| Q0VGG5        | PI3K-alpha                                                   | 5.57        | 3        |
| B2RWS7        | Zinc finger protein 609                                      | 5.54        | 2        |
| F1ABR9        | Ager                                                         | 5.54        | 2        |
| B6ZCE5        | Proteinase 3                                                 | 5.54        | 2        |
| Q3KPB0        | Olfactory receptor 616                                       | 5.54        | 2        |
| Q8JZU4        | Forkhead box A3                                              | 5.53        | 2        |
| D3Z6S9        | Family with sequence similarity 194, member A                | 5.52        | 2        |
| Q148W8        | Inactive dual specificity phosphatase 27                     | 5.52        | 2        |
| B4XVN8        | SET domain bifurcated protein 2 variant A.1                  | 5.51        | 2        |
| P16015        | Carbonic anhydrase 3                                         | 5.51        | 2        |
| Q8BIW9        | Chromosome transmission fidelity protein 18 homolog          | 5.49        | 4        |
| A1L3S7        | Gatad2b                                                      | 5.48        | 2        |
| Q149F3        | Gspt2                                                        | 5.45        | 2        |
| Q64163        | Transcription factor Dp-2                                    | 5.45        | 2        |

|               |                                                              |             |          |
|---------------|--------------------------------------------------------------|-------------|----------|
| Q8VED5        | Keratin, type II cytoskeletal 79                             | 5.41        | 2        |
| Q7TPR0        | E3 ubiquitin-protein ligase RNF14                            | 5.40        | 3        |
| Q8CCP0        | Nuclear export mediator factor                               | 5.38        | 2        |
| Q5D0D8        | Glucosaminyl (N-acetyl) transferase 1, core 2                | 5.36        | 2        |
| Q6PB60        | Basic helix-loop-helix domain containing, class B9           | 5.36        | 2        |
| Q9CWR8        | DNA (cytosine-5)-methyltransferase 3-like                    | 5.35        | 2        |
| <b>E9Q6U9</b> | <b>Collagen alpha-2(I) chain</b>                             | <b>5.35</b> | <b>3</b> |
| Q62381        | Tolloid-like protein 1                                       | 5.33        | 7        |
| Q91Y06        | Protocadherin beta 13                                        | 5.33        | 2        |
| Q8CG46        | Structural maintenance of chromosomes protein 5              | 5.33        | 2        |
| Q52KI9        | Zinc finger protein 592                                      | 5.32        | 2        |
| Q5DTM8        | E3 ubiquitin-protein ligase BRE1A                            | 5.31        | 2        |
| Q6NS59        | Family with sequence similarity 135, member A                | 5.30        | 2        |
| Q99LG0        | Ubiquitin carboxyl-terminal hydrolase 16                     | 5.30        | 2        |
| A2AQ19        | RNA polymerase-associated protein RTF1 homolog               | 5.27        | 2        |
| B2RWU4        | Cordon-bleu                                                  | 5.27        | 2        |
| B2RWU4        | Zinc finger protein 609                                      | 5.27        | 2        |
| B7ZMU4        | Rho-related BTB domain containing 1                          | 5.23        | 2        |
| Q3LRV6        | Voltage-gated chloride channel CIC-4A                        | 5.22        | 2        |
| A2AA59        | PHD Finger protein 15                                        | 5.21        | 2        |
| D3YYK0        | Abhydrolase domain containing 11, isoform CRA_b              | 5.21        | 3        |
| P50396        | Rab GDP dissociation inhibitor alpha                         | 5.21        | 2        |
| Q6IRU2        | Tropomyosin alpha-4 chain                                    | 5.20        | 2        |
| Q8CHE4        | Phlpp1                                                       | 5.19        | 3        |
| Q8JZQ3        | ST8 alpha-N-acetyl-neuraminide alpha-2,8-sialyltransferase 5 | 5.18        | 2        |
| Q9D2I5        | LisH domain-containing protein ARMC9                         | 5.17        | 2        |
| Q99K58        | Fibulin 2                                                    | 5.14        | 3        |
| Q4FZC9        | Nesprin-3                                                    | 5.13        | 2        |
| A2RT18        | Testis expressed gene 16                                     | 5.12        | 2        |
| Q14BE5        | Forkhead box B2                                              | 5.12        | 2        |
| Q99J95        | Cyclin-dependent kinase 9                                    | 5.12        | 2        |
| A2A6H3        | F-box only protein 47                                        | 5.11        | 2        |
| Q8BVN3        | Cation channel sperm-associated protein 4                    | 5.06        | 2        |
| Q6DIC7        | Phosphatidylinositol 4-kinase, catalytic, alpha polypeptide  | 5.04        | 3        |
| <b>P19001</b> | <b>Keratin, type I cytoskeletal 19</b>                       | <b>5.00</b> | <b>2</b> |
| Q05AH2        | Zinc finger, CW type with PWWP domain 2                      | 4.99        | 2        |
| Q64433        | 10 kDa heat shock protein, mitochondrial                     | 4.99        | 7        |
| Q7TQU4        | Olfactory receptor 1361                                      | 4.99        | 3        |
| P09027        | Homeobox protein Hox-D3                                      | 4.97        | 2        |
| Q05BG1        | CCR4-NOT transcription complex, subunit 4                    | 4.96        | 2        |
| E9QKT8        | Alstrom syndrome protein 1 homolog                           | 4.93        | 2        |
| <b>P28654</b> | <b>Decorin</b>                                               | <b>4.93</b> | <b>2</b> |
| B2RWX5        | Centrosomal protein 250                                      | 4.91        | 2        |
| Q5F204        | Putative malate dehydrogenase 1B                             | 4.91        | 8        |
| Q8VI16        | B3gnt9                                                       | 4.88        | 2        |
| Q2KHP0        | Kcna1                                                        | 4.87        | 3        |
| E9QNC3        | Serine/threonine-protein kinase Nek11                        | 4.86        | 2        |
| Q9D3D0        | Alpha-tocopherol transfer protein-like                       | 4.85        | 2        |
| P08905        | Lysozyme C-2                                                 | 4.85        | 2        |

|               |                                                          |             |          |
|---------------|----------------------------------------------------------|-------------|----------|
| Q0VGB8        | Synaptic nuclear envelope 1                              | 4.83        | 2        |
| Q8VDU9        | Tripartite motif containing 41                           | 4.82        | 3        |
| B2RRD1        | Tudor domain containing 6                                | 4.81        | 2        |
| Q9JK37        | Myozenin-1                                               | 4.80        | 2        |
| Q14AP0        | Thioredoxin domain containing 8                          | 4.78        | 2        |
| Q8C120        | SH3 domain-containing RING finger protein 3              | 4.77        | 2        |
| Q9WVS5        | Chaperonin containing TCP-1 theta subunit                | 4.77        | 2        |
| Q0VDP6        | Hypocretin (orexin) receptor 1                           | 4.76        | 3        |
| Q78HU3        | Multivesicular body subunit 12A                          | 4.74        | 2        |
| Q9DD20        | Methyltransferase-like protein 7B                        | 4.71        | 2        |
| E9QJZ4        | Fibrillin-2                                              | 4.69        | 2        |
| B9EKK3        | IQ motif containing GTPase activating protein 2          | 4.68        | 2        |
| P00920        | Carbonic anhydrase 2                                     | 4.67        | 2        |
| E9QKV8        | Nrde-2 necessary for RNA interference, domain containing | 4.65        | 3        |
| Q3V3F1        | Nicotinamide mononucleotide adenylyltransferase 3        | 4.65        | 2        |
| A2BE28        | Ribosomal biogenesis protein LAS1L                       | 4.64        | 2        |
| B7ZP22        | Heterogeneous nuclear ribonucleoprotein A2/B1            | 4.64        | 2        |
| B2RWX4        | Rint1                                                    | 4.63        | 2        |
| Q05BH2        | Tetraspanin-5                                            | 4.63        | 3        |
| B1AXY5        | Beta-1,4-galactosyltransferase 1                         | 4.62        | 2        |
| <b>P11679</b> | <b>Keratin, type II cytoskeletal 8</b>                   | <b>4.62</b> | <b>2</b> |
| Q75WD0        | Protein-arginine deiminase type-2                        | 4.61        | 3        |
| P28665        | Murinoglobulin-1                                         | 4.59        | 2        |
| Q80TA6        | Myotubularin-related protein 12                          | 4.58        | 3        |
| P59530        | Taste receptor type 2 member 7                           | 4.58        | 2        |
| P51150        | Ras-related protein Rab-7a                               | 4.57        | 2        |
| Q68EF9        | Signal peptide, CUB domain, EGF-like 1                   | 4.56        | 2        |
| D5MP63        | Kinesin-like protein KIF26B                              | 4.55        | 2        |
| B7FAU9        | Filamin, alpha                                           | 4.54        | 2        |
| A1A557        | Cartilage oligomeric matrix protein                      | 4.52        | 2        |
| E9QMY2        | E3 ubiquitin-protein ligase CBL-B                        | 4.50        | 2        |
| Q7TNT9        | Elk3                                                     | 4.50        | 3        |
| C4P6S0        | Sperm head and tail associated protein                   | 4.49        | 2        |
| Q9JJJ0        | Calcium transporting protein homolog                     | 4.49        | 2        |
| Q6PBG2        | NADH dehydrogenase (ubiquinone) 1 alpha subcomplex 11    | 4.47        | 2        |
| E9Q010        | Dynein heavy chain 8, axonemal                           | 4.46        | 4        |
| Q6SLK2        | Protein kinase lysine deficient 1                        | 4.42        | 4        |
| B2RXT5        | Glucose-6-phosphate isomerase                            | 4.39        | 2        |
| O55124        | Myomesin 2                                               | 4.38        | 2        |
| Q62261        | Spectrin beta chain, non-erythrocytic 1                  | 4.37        | 4        |
| O88329        | Unconventional myosin-1a                                 | 4.36        | 2        |
| Q3TIU4        | 2',5'-phosphodiesterase 12                               | 4.35        | 2        |
| E3VWA1        | Slc4a4                                                   | 4.31        | 2        |
| Q8R2H9        | Phosphatase, orphan 1                                    | 4.31        | 2        |
| Q9CSH3        | Exosome complex exonuclease RRP44                        | 4.30        | 2        |
| Q810R0        | Sycp3 like Y-linked                                      | 4.28        | 4        |
| O70251        | Elongation factor 1-beta                                 | 4.27        | 2        |
| A2AHK7        | Mucin-15                                                 | 4.26        | 2        |
| B2RXX7        | Nance-Horan syndrome                                     | 4.25        | 2        |

|        |                                                            |      |   |
|--------|------------------------------------------------------------|------|---|
| E9QM71 | Cytoplasmic dynein 1 heavy chain 1                         | 4.24 | 2 |
| Q8BFZ3 | Actin, beta-like 2                                         | 4.24 | 3 |
| Q04899 | Cyclin-dependent kinase 18                                 | 4.22 | 3 |
| Q0VB79 | T-cell ecto-ADP-ribosyltransferase 1                       | 4.21 | 2 |
| Q9EQD6 | Keratin intermediate filament 16a                          | 4.20 | 2 |
| Q2WF71 | Lrfr1                                                      | 4.20 | 2 |
| B8XCJ6 | Protein unc-80 homolog                                     | 4.18 | 2 |
| Q6P9Q2 | Polymerase (RNA) I polypeptide B                           | 4.18 | 5 |
| Q9CVL5 | CutA divalent cation tolerance homolog                     | 4.16 | 2 |
| O88799 | Zonadhesin                                                 | 4.15 | 2 |
| Q9EPL8 | Importin-7                                                 | 4.14 | 2 |
| Q1ZZX0 | Toll-like receptor 5                                       | 4.13 | 2 |
| Q8CIP4 | MAP/microtubule affinity-regulating kinase 4               | 4.13 | 3 |
| Q9EPS7 | Pheromone receptor V3R6                                    | 4.13 | 2 |
| Q921T1 | Transforming growth factor, beta 2                         | 4.12 | 2 |
| E9PZZ1 | PR domain zinc finger protein 13                           | 4.10 | 2 |
| Q2XP45 | Phosphatidic acid-preferring phospholipase A1 variant 2    | 4.10 | 2 |
| E9QMR9 | Protocadherin Fat 4                                        | 4.07 | 2 |
| Q91ZF5 | Calcium-activated chloride channel CLCA4                   | 4.06 | 2 |
| P27573 | Myelin protein P0                                          | 4.06 | 2 |
| Q99P72 | Reticulon-4                                                | 4.06 | 2 |
| B7ZMZ7 | DIP2 disco-interacting protein 2 homolog C (Drosophila)    | 4.04 | 2 |
| Q91WB5 | Androgen binding protein alpha                             | 4.04 | 2 |
| Q8C963 | Coiled-coil domain-containing protein 159                  | 4.01 | 2 |
| Q8K0J2 | B3gnt7                                                     | 4.01 | 2 |
| Q8VDV3 | Guanine nucleotide exchange factor for Rab-3A              | 4.01 | 3 |
| Q8K287 | Armadillo repeat containing 5                              | 4.00 | 2 |
| Q05DC5 | Mitochondrial ribosomal protein L3                         | 3.99 | 2 |
| E9PV27 | Pheromone receptor V3R1                                    | 3.96 | 2 |
| Q924J9 | Six-transmembrane epithelial antigen of the prostate       | 3.94 | 2 |
| B7ZWK3 | Spectrin alpha, non-erythrocytic 1                         | 3.89 | 2 |
| C6EQH2 | ASL1/Herc2 fusion protein                                  | 3.88 | 2 |
| P04104 | Keratin, type II cytoskeletal 1                            | 3.88 | 2 |
| P62878 | E3 ubiquitin-protein ligase RBX1                           | 3.88 | 2 |
| B7ZNM9 | DNA topoisomerase 1, mitochondrial                         | 3.86 | 2 |
| Q8R429 | Sarcoplasmic/endoplasmic reticulum calcium ATPase 1        | 3.86 | 2 |
| B2RQL6 | Myosin light chain kinase 3                                | 3.85 | 2 |
| A2ADF7 | Solute carrier family 25 member 34                         | 3.82 | 2 |
| Q9D2X5 | MAU2 chromatid cohesion factor homolog                     | 3.80 | 2 |
| Q99L13 | 3-hydroxyisobutyrate dehydrogenase, mitochondrial          | 3.77 | 3 |
| Q9JI38 | tRNA pseudouridine(38/39) synthase                         | 3.77 | 2 |
| Q4VBF8 | Signal-induced proliferation-associated 1 like 1           | 3.76 | 3 |
| Q8C0P0 | Microtubule associated serine/threonine kinase-like        | 3.76 | 4 |
| E9QAC1 | Bromodomain and WD repeat-containing protein 1             | 3.75 | 3 |
| Q8R1X8 | Oxysterol-binding protein 6                                | 3.75 | 2 |
| A0AUM9 | Translation initiation factor eIF-2B subunit gamma         | 3.75 | 2 |
| B1ARM7 | Aspm1                                                      | 3.75 | 2 |
| A6NAW3 | Alpha46-takusan                                            | 3.73 | 2 |
| D3YZF7 | V-set and immunoglobulin domain-containing protein 10-like | 3.72 | 4 |

|               |                                                         |             |          |
|---------------|---------------------------------------------------------|-------------|----------|
| E3VVQ8        | Supervillin muscle-specific isoform                     | 3.72        | 2        |
| Q6NS69        | APC membrane recruitment protein 3                      | 3.72        | 5        |
| B7ZWN0        | Sodium channel, voltage-gated, type IX, alpha           | 3.69        | 2        |
| Q0VBT4        | Tryptophan 5-hydroxylase 2                              | 3.66        | 2        |
| B2RY47        | Rhotekin 2                                              | 3.65        | 2        |
| B2RXR3        | CCR4-NOT transcription complex, subunit 1               | 3.64        | 2        |
| Q1XGY5        | Fras1 related extracellular matrix protein 2            | 3.62        | 3        |
| Q8K203        | Endonuclease 8-like 3                                   | 3.62        | 3        |
| Q9JK98        | Clusterin                                               | 3.62        | 2        |
| <b>Q61282</b> | <b>Aggrecan core protein</b>                            | <b>3.62</b> | <b>2</b> |
| Q922R7        | Testis expressed gene 10                                | 3.60        | 3        |
| B2RSV7        | FYVE, RhoGEF and PH domain containing 6                 | 3.57        | 2        |
| Q99MQ4        | Asporin                                                 | 3.57        | 3        |
| B2RX10        | Fanconi anemia, complementation group M                 | 3.56        | 3        |
| Q80UM4        | Tyrosine-protein phosphatase non-receptor type 12       | 3.54        | 2        |
| Q0QJG0        | Nanog homeobox pseudogene                               | 3.53        | 3        |
| Q04447        | Creatine kinase B-type                                  | 3.52        | 2        |
| Q6NV59        | Lysyl oxidase-like 4                                    | 3.48        | 2        |
| Q8K0R1        | Xinc finger protein 644                                 | 3.47        | 3        |
| B1AWC9        | Phosphodiesterase 4B, cAMP specific                     | 3.45        | 2        |
| B9UM22        | G-protein-coupled receptor 81                           | 3.45        | 2        |
| Q03172        | Zinc finger protein 40                                  | 3.45        | 3        |
| Q8CFE8        | F-box and WD-40 domain protein 17                       | 3.45        | 3        |
| Q148V8        | Family with sequence similarity 83, member H            | 3.43        | 3        |
| Q8CH77        | Neuron navigator 1                                      | 3.43        | 2        |
| C6EQK3        | L1 unspliced fusion gene protein                        | 3.42        | 2        |
| A2AQ14        | Protein Mis18-beta                                      | 3.41        | 2        |
| P15533        | Tripartite motif-containing protein 30A                 | 3.36        | 2        |
| B7ZN63        | PRELI domain containing 2                               | 3.33        | 2        |
| P70124        | Serpin B5                                               | 3.33        | 2        |
| Q7M753        | Pantothenate kinase 2                                   | 3.32        | 3        |
| Q8BHL3        | TBC1 domain family member 10B                           | 3.32        | 3        |
| Q7TQ32        | Hemojuvelin                                             | 3.32        | 2        |
| Q9CQ52        | Chymotrypsin-like elastase family member 3B             | 3.31        | 3        |
| Q9CQ52        | Chymotrypsin-like elastase family member 3B             | 3.31        | 3        |
| B7ZNT3        | Signal-regulatory protein beta 1C                       | 3.30        | 2        |
| B8JJ87        | Apoptotic chromatin condensation inducer in the nucleus | 3.30        | 2        |
| O35452        | Tenascin X                                              | 3.30        | 2        |
| B8JJ87        | Apoptotic chromatin condensation inducer in the nucleus | 3.30        | 2        |
| B2RY09        | Enhancer trap locus 4                                   | 3.29        | 2        |
| Q6GUA3        | Periostin, osteoblast specific factor                   | 3.29        | 2        |
| B2RY09        | Enhancer trap locus 4                                   | 3.29        | 2        |
| B9EKA5        | Melanophilin                                            | 3.28        | 2        |
| Q7TMG7        | Natriuretic peptide receptor 3                          | 3.28        | 3        |
| E9QLA1        | Adamts20                                                | 3.26        | 2        |
| Q9CR78        | Myb/SANT-like DNA-binding domain-containing protein 3   | 3.24        | 2        |
| Q91X22        | Serpina1b                                               | 3.20        | 3        |
| P43274        | Histone H1.4                                            | 3.19        | 4        |
| B7SNM9        | Transformed mouse 3T3 cell double minute 1              | 3.15        | 2        |



|        |                                                         |      |   |
|--------|---------------------------------------------------------|------|---|
| P08399 | Putative per-hexamer repeat protein 5                   | 3.15 | 2 |
| B7SNM9 | Transformed mouse 3T3 cell double minute 1              | 3.15 | 2 |
| B2RSU6 | Cingulin-like 1                                         | 3.14 | 2 |
| B2RXM4 | Alpha N-terminal protein methyltransferase 1B           | 3.12 | 2 |
| Q5F259 | Ankyrin repeat domain-containing protein 13B            | 3.10 | 2 |
| Q58IU7 | Cathepsin R                                             | 3.07 | 2 |
| Q91ZQ1 | cGMP phosphodiesterase 6C                               | 3.07 | 3 |
| B2RQR2 | Multiple PDZ domain protein                             | 3.06 | 2 |
| D6RGA8 | Coenzyme Q2 homolog, prenyltransferase (yeast)          | 3.06 | 2 |
| P63058 | Thyroid hormone receptor alpha                          | 3.04 | 2 |
| B2RRJ9 | Adenylate cyclase type 10                               | 3.02 | 2 |
| A2AFK4 | GTP binding protein 5, isoform CRA_a                    | 3.01 | 2 |
| B9EKT6 | IQ motif containing GTPase activating protein 3         | 3.01 | 2 |
| P07724 | Serum albumin                                           | 3.01 | 2 |
| P51612 | DNA repair protein complementing XP-C cells homolog     | 3.00 | 2 |
| A2ARZ3 | Fibrous sheath-interacting protein 2                    | 2.99 | 2 |
| Q9CWI9 | Bifunctional purine biosynthesis protein PURH           | 2.98 | 2 |
| Q61584 | Fragile X mental retardation syndrome-related protein 1 | 2.97 | 2 |
| Q61584 | Fragile X mental retardation syndrome-related protein 1 | 2.97 | 2 |
| Q3TJG2 | Acyl carrier protein                                    | 2.95 | 2 |
| B2RUA0 | Vomerolateral 1 receptor, l2                            | 2.95 | 2 |
| Q80ZS3 | 28S ribosomal protein S26, mitochondrial                | 2.93 | 3 |
| Q8BZ71 | SH3 and cysteine-rich domain-containing protein 3       | 2.93 | 2 |
| P97401 | Secreted frizzled-related protein 3                     | 2.90 | 3 |
| Q2NKY1 | Thyroglobulin                                           | 2.90 | 3 |
| P70196 | TNF receptor-associated factor 6                        | 2.88 | 4 |
| Q8K4C5 | Interleukin-17C                                         | 2.87 | 2 |
| B7ZNH7 | Collagen alpha-1(XIV) chain                             | 2.86 | 2 |
| Q8CFJ9 | WD repeat-containing protein 24                         | 2.86 | 3 |
| P13542 | Myosin-8                                                | 2.86 | 2 |
| B1ATA2 | CASK-interacting protein 2                              | 2.84 | 2 |
| Q0P5X1 | Leucine-rich repeat and IQ domain-containing protein 1  | 2.83 | 2 |
| Q0VFX6 | Zinc finger, DHHC domain containing 17                  | 2.82 | 3 |
| Q80TR8 | Vpr (HIV-1) binding protein                             | 2.81 | 2 |
| P51885 | Lumican                                                 | 2.80 | 2 |
| Q9CXZ1 | Ndufs4                                                  | 2.80 | 2 |
| Q6PG97 | CD1d2                                                   | 2.80 | 4 |
| P08228 | Superoxide dismutase [Cu-Zn]                            | 2.78 | 2 |
| A9Q751 | Primary ciliary dyskinesia protein 1                    | 2.76 | 2 |
| B8QI35 | Liprin-alpha 3                                          | 2.76 | 2 |
| P09542 | Myosin light chain 3                                    | 2.76 | 2 |
| Q8C7H1 | Methylmalonic aciduria type A homolog, mitochondrial    | 2.74 | 2 |
| D3YXT2 | ribosomal protein L10A, pseudogene 2                    | 2.72 | 2 |
| Q6PGN3 | Serine/threonine-protein kinase DCLK2                   | 2.72 | 4 |
| Q6NXJ0 | WW, C2 and coiled-coil domain containing 2              | 2.71 | 5 |
| Q8R3C0 | Mini-chromosome maintenance complex-binding protein     | 2.71 | 3 |
| Q05BZ2 | Poly (ADP-ribose) polymerase family, member 6           | 2.71 | 2 |
| Q543V3 | Insulin receptor substrate 1                            | 2.71 | 4 |
| Q8K1X1 | WD repeat-containing protein 11                         | 2.70 | 2 |

|        |                                                            |      |   |
|--------|------------------------------------------------------------|------|---|
| D3Z6F5 | ATP synthase subunit alpha                                 | 2.68 | 2 |
| D3Z6J1 | DEP domain containing 1a, isoform CRA c                    | 2.68 | 3 |
| E9QNM2 | Histone-lysine N-methyltransferase ASH1L                   | 2.68 | 2 |
| P68254 | 14-3-3 protein theta                                       | 2.68 | 2 |
| Q5M956 | BTB/POZ domain-containing protein KCTD1                    | 2.68 | 2 |
| B6VJS3 | 5-hydroxytryptamine receptor 7                             | 2.67 | 2 |
| C9K0Y7 | AMPA-selective glutamate receptor 4 flop type              | 2.61 | 2 |
| O35409 | Glutamate carboxypeptidase 2                               | 2.60 | 2 |
| B7ZNV8 | Ankyrin repeat domain 42                                   | 2.54 | 2 |
| Q5SW50 | Olfactory receptor 462                                     | 2.51 | 3 |
| Q6PFZ4 | Structural maintenance of chromosomes 3                    | 2.50 | 3 |
| Q8VCK3 | Tubulin gamma-2 chain                                      | 2.49 | 3 |
| Q9CR68 | Cytochrome b-c1 complex subunit Rieske, mitochondrial      | 2.45 | 2 |
| P97952 | Sodium channel subunit beta-1                              | 2.41 | 2 |
| Q3TDU5 | Milk fat globule-EGF factor 8 protein, isoform CRA_a       | 2.41 | 2 |
| Q49714 | Keratin, type I cuticular Ha5                              | 2.41 | 2 |
| A2AEP2 | Cyclin B3                                                  | 2.40 | 2 |
| P97321 | Seprase                                                    | 2.40 | 2 |
| P97321 | Seprase                                                    | 2.40 | 2 |
| B9EKJ4 | YEATS domain containing 2                                  | 2.39 | 2 |
| P61982 | 14-3-3 protein gamma                                       | 2.38 | 2 |
| Q14B48 | Coiled-coil domain-containing protein 129                  | 2.37 | 2 |
| Q14BM5 | Nephrocystin-3                                             | 2.37 | 2 |
| Q8R3R8 | Gamma-aminobutyric acid receptor-associated protein-like 1 | 2.37 | 2 |
| Q8VE11 | Myotubularin-related protein 6                             | 2.37 | 3 |
| Q61166 | Microtubule-associated protein RP/EB family member 1       | 2.36 | 5 |
| E9QPG9 | Extracellular matrix protein FRAS1                         | 2.35 | 2 |
| Q8CFE4 | SCY1-like protein 2                                        | 2.35 | 2 |
| O70577 | Solute carrier family 22 member 2                          | 2.30 | 2 |
| B7ZNI2 | Ankyrin and armadillo repeat containing                    | 2.28 | 2 |
| E9PUH2 | Fam208A                                                    | 2.26 | 2 |
| D3Z4L1 | Mthfsd                                                     | 2.24 | 3 |
| B7ZNX0 | AF4/FMR2 family, member 4                                  | 2.23 | 2 |
| Q14BE7 | Family with sequence similarity 47, member A               | 2.23 | 3 |
| Q3UW98 | Chloride channel calcium activated 7                       | 2.23 | 2 |
| B6ZHD0 | Erythrocyte protein band 4.1-like 2                        | 2.23 | 2 |
| E9Q8I9 | Furry homolog                                              | 2.22 | 2 |
| Q0V8T7 | Contactin-associated protein like 5-3                      | 2.22 | 2 |
| Q9CQU1 | Microfibrillar-associated protein 1                        | 2.21 | 3 |
| Q61176 | Arginase-1                                                 | 2.19 | 3 |
| B2RQL2 | Storkhead box 1                                            | 2.18 | 2 |
| P27773 | Protein disulfide-isomerase A3                             | 2.18 | 2 |
| E9PYY5 | WD repeat-containing protein 78                            | 2.16 | 2 |
| P20065 | Thymosin beta-4                                            | 2.16 | 2 |
| E9QPH5 | Sterile alpha motif domain-containing protein 3            | 2.15 | 2 |
| Q9R0L7 | A-kinase anchor protein 8-like                             | 2.12 | 2 |
| Q0VBL1 | Tigger transposable element-derived protein 2              | 2.11 | 2 |
| Q8VIE5 | BetaIV-spectrin sigma1                                     | 2.10 | 2 |
| Q08EI4 | Matrix metalloproteinase 21                                | 2.07 | 4 |

|        |                                                    |      |   |
|--------|----------------------------------------------------|------|---|
| P52480 | Pyruvate kinase PKM                                | 2.04 | 9 |
| Q14BE0 | Molybdenum cofactor synthesis 3                    | 2.04 | 3 |
| Q61884 | Meiosis-specific nuclear structural protein 1      | 2.04 | 2 |
| Q8QZX2 | HAUS augmin-like complex subunit 3                 | 2.04 | 3 |
| B9EHI6 | Oviductal glycoprotein 1, 120kDa                   | 2.03 | 2 |
| Q8VDU0 | G-protein signalling modulator 2                   | 2.03 | 2 |
| P30933 | Seminal vesicle secretory protein 5                | 2.03 | 4 |
| Q402U7 | Serine protease 44                                 | 2.02 | 3 |
| Q32NZ7 | Cingulin                                           | 2.00 | 2 |
| Q8C4X2 | Casein kinase 1, gamma 3                           | 2.00 | 3 |
| Q9D2D7 | Zinc finger protein 687                            | 2.00 | 2 |
| Q9CZP7 | Hsp90 co-chaperone Cdc37-like 1                    | 1.99 | 2 |
| Q059Q0 | Coiled-coil domain containing 11                   | 1.97 | 3 |
| Q8BYK4 | Retinol dehydrogenase 12                           | 1.94 | 3 |
| Q91VK0 | Proprotein convertase subtilisin/kexin type 5      | 1.93 | 3 |
| B7ZMW6 | CD163                                              | 1.91 | 2 |
| Q3TLH4 | Proline-rich coiled-coil 2C                        | 1.91 | 2 |
| Q0KIX1 | KIBRA                                              | 1.91 | 4 |
| Q148A4 | Protein phosphatase 1 regulatory subunit 32        | 1.90 | 3 |
| P13541 | Myosin-3                                           | 1.90 | 2 |
| Q9R1A8 | E3 ubiquitin-protein ligase RFWD2                  | 1.89 | 2 |
| A2A9C3 | Protein SZT2                                       | 1.89 | 2 |
| Q5XKN4 | Jagunal homolog 1                                  | 1.88 | 2 |
| B7ZN50 | Syntaxin binding protein 5-like                    | 1.87 | 2 |
| A0JNY7 | Eukaryotic translation initiation factor 4 gamma 2 | 1.86 | 2 |
| Q61852 | Smooth muscle gamma-actin                          | 1.86 | 2 |
| D0VLQ5 | Tet methylcytosine dioxygenase 2                   | 1.85 | 2 |
| P29754 | Type-1A angiotensin II receptor                    | 1.85 | 2 |
| Q03142 | Fibroblast growth factor receptor 4                | 1.85 | 3 |
| Q8BFW9 | Slc2a12                                            | 1.85 | 2 |
| Q3UHZ5 | Leiomodin-2                                        | 1.85 | 2 |
| C7TQ59 | Calcium channel voltage-dependent alpha1c subunit  | 1.83 | 2 |
| Q6DFW4 | Nucleolar protein 58                               | 1.82 | 5 |
| B1AR69 | Myosin, heavy chain 13, skeletal muscle            | 1.82 | 2 |
| Q01097 | Glutamate receptor ionotropic, NMDA 2B             | 1.76 | 2 |
| Q6PCN6 | Microrchidia 2A                                    | 1.75 | 3 |
| Q99JF5 | Diphosphomevalonate decarboxylase                  | 1.75 | 2 |
| Q9DBS8 | Centrosomal protein POC5                           | 1.75 | 2 |
| B2RQS6 | DEAH (Asp-Glu-Ala-His) box polypeptide 36          | 1.74 | 2 |
| Q8CJ70 | Interleukin-19                                     | 1.74 | 2 |
| P51881 | ADP/ATP translocase 2                              | 1.72 | 4 |
| B1B1A8 | Myosin light chain kinase, smooth muscle           | 1.72 | 2 |
| Q99ML9 | E3 ubiquitin-protein ligase Arkadia                | 1.71 | 3 |
| C3S7Q5 | Ojoplano variant A                                 | 1.70 | 2 |
| P63028 | Translationally-controlled tumor protein           | 1.68 | 2 |
| Q8C0F9 | Inactive serine protease 35                        | 1.68 | 4 |
| Q5H8C4 | Vacuolar protein sorting-associated protein 13A    | 1.67 | 4 |
| Q501L5 | Osteomodulin                                       | 1.64 | 3 |
| P07744 | Keratin, type II cytoskeletal 4                    | 1.63 | 2 |

|        |                                                        |      |   |
|--------|--------------------------------------------------------|------|---|
| Q8VII7 | Receptor activity modifying protein 1                  | 1.62 | 2 |
| B9EHJ7 | Tcf20 protein                                          | 1.60 | 2 |
| E9QMH9 | Nuclear receptor coactivator 2                         | 1.60 | 2 |
| Q8CCX5 | Keratin 222                                            | 1.59 | 2 |
| B7ZNV2 | GLI-Kruppel family member GLI3                         | 1.58 | 2 |
| Q8C761 | WD repeat-containing protein 60                        | 1.57 | 3 |
| P62082 | 40S ribosomal protein S7                               | 1.56 | 2 |
| B9EKS2 | Jumonji domain containing 1B                           | 1.55 | 2 |
| B9EKC6 | Aldehyde oxidase 3-like 1                              | 1.54 | 2 |
| Q7M759 | Alpha/beta hydrolase domain-containing protein 17B     | 1.47 | 2 |
| E9QNG9 | Serine/threonine-protein kinase B-raf                  | 1.44 | 2 |
| P08730 | Keratin, type I cytoskeletal 13                        | 1.39 | 2 |
| B7ZND9 | Testis expressed gene 9                                | 1.38 | 2 |
| Q8K224 | N-acetyltransferase 10                                 | 1.37 | 2 |
| P17751 | Triosephosphate isomerase                              | 1.36 | 2 |
| E9Q401 | Ryanodine receptor 2                                   | 1.35 | 5 |
| Q05D94 | Copine VIII                                            | 1.35 | 2 |
| Q0KK56 | Family with sequence similarity 184, member B          | 1.33 | 4 |
| Q3TRR0 | Microtubule-associated protein 9                       | 1.33 | 2 |
| P53349 | Mitogen-activated protein kinase kinase kinase 1       | 1.29 | 9 |
| P70452 | Syntaxin-4                                             | 1.28 | 2 |
| P61082 | NEDD8-conjugating enzyme Ubc12                         | 1.27 | 2 |
| Q7TQG5 | Neogenin                                               | 1.27 | 2 |
| Q3UEH4 | Pyruvate kinase liver and red blood cell               | 1.26 | 2 |
| E9Q555 | E3 ubiquitin-protein ligase RNF213                     | 1.17 | 5 |
| Q8VG97 | Olfactory receptor 1132                                | 1.16 | 3 |
| Q8VG50 | Olfactory receptor 922                                 | 1.15 | 2 |
| Q62018 | RNA polymerase-associated protein CTR9 homolog         | 1.14 | 2 |
| Q8CHW3 | Mitochondrial ribosomal protein L23                    | 1.11 | 3 |
| Q9JKE5 | ELKL motif kinase 2 long form                          | 1.05 | 2 |
| Q99JY8 | Lipid phosphate phosphohydrolase 3                     | 1.04 | 2 |
| Q9D168 | Integrator complex subunit 12                          | 0.96 | 2 |
| Q61784 | ORF1                                                   | 0.91 | 2 |
| C9K0Z6 | CNTF receptor alpha subunit                            | 0.89 | 2 |
| Q80UH6 | Nucleotide-binding oligomerization domain containing 2 | 0.89 | 2 |
| Q0VG46 | Calcyphosphine 2                                       | 0.85 | 2 |
| Q7TSF0 | Desmoglein-1-gamma                                     | 0.84 | 2 |
| B7ZWF1 | DEAD (Asp-Glu-Ala-Asp) box helicase 3, X-linked        | 0.71 | 2 |
| Q2YFS4 | Zinc finger CW-type PWWP domain protein 1              | 0.34 | 2 |

---
